# Supplementary material
Source: PubMed Central journal article supplement (PMC4517205)
Supplement: pnas.1502136112.sapp.pdf [file pnas.1502136112.sapp.pdf]

# Supplemental Information to “A new Method to compute $R_{\text{complete}}$ enables Maximum Likelihood Refinement for Small Data Sets”

J. Luebben & T.Gruene

Proceedings of the National Academy of Sciences of the United States of America

## Contents

|          |                                                                          |           |
|----------|--------------------------------------------------------------------------|-----------|
| <b>1</b> | <b>Numerical Results for the various Experiments of the Main Article</b> | <b>3</b>  |
| 1.1      | Data Preparation and Calculation of $R_{\text{complete}}$ . . . . .      | 3         |
| 1.2      | Stability with respect to the Test Set Size . . . . .                    | 4         |
| 1.3      | Stability of $R_{\text{complete}}$ with Partition . . . . .              | 4         |
| 1.4      | Validation: How “free” is $R_{\text{complete}}$ . . . . .                | 7         |
| 1.4.1    | Elastase data set (8) . . . . .                                          | 7         |
| 1.4.2    | Small Molecule Data Sets (2) & (3) . . . . .                             | 13        |
| 1.5      | Validation II: Comparison with Calculated Data . . . . .                 | 13        |
| 1.6      | Effect of Parameter Perturbation . . . . .                               | 16        |
| 1.6.1    | Non–Centrosymmetric Space Group, Data Set (6) . . . . .                  | 16        |
| 1.6.2    | Centrosymmetric Space Group, Data Set (1) . . . . .                      | 20        |
| 1.7      | Influence of Parameter Perturbation on Convergence Rate . . . . .        | 20        |
| <b>2</b> | <b>Crystallization and Data Collection for Data Sets (8) and (6)</b>     | <b>20</b> |
| 2.1      | Elastase Data Set (8) . . . . .                                          | 20        |
| 2.2      | Insulin Data Set (6) . . . . .                                           | 24        |
| <b>3</b> | <b>Scripts</b>                                                           | <b>25</b> |
| 3.1      | Regular Grid into Asymmetric Unit . . . . .                              | 25        |
| 3.2      | $R_{\text{complete}}$ based Electron Density Maps . . . . .              | 26        |
| 3.3      | Data Statistics from Overfitted Data . . . . .                           | 26        |
| <b>4</b> | <b>Coordinate Error and Outlier Detection</b>                            | <b>28</b> |

**List of Tables**

|     |                                                                                                 |    |
|-----|-------------------------------------------------------------------------------------------------|----|
| S1  | $R_{\text{complete}}$ does not depend on the size of the test set. Data set (5) . . . . .       | 4  |
| S2  | $R_{\text{complete}}$ does not depend on the size of the test set. Data set (6') . . . . .      | 7  |
| S3  | $R_{\text{complete}}$ independence from partitions. Data set (6') . . . . .                     | 8  |
| S4  | $R_{\text{complete}}$ independence from partitions. Data set (4) . . . . .                      | 8  |
| S5  | $R_{\text{complete}}$ independence from partitions. Data set (7) . . . . .                      | 9  |
| S6  | $R_{\text{complete}}$ low variance with partitions. . . . .                                     | 9  |
| S7  | Comparison of $R_{\text{complete}}$ with $R_{\text{free}}$ , data set (8). Runs 1-30 . . . . .  | 10 |
| S8  | Comparison of $R_{\text{complete}}$ with $R_{\text{free}}$ , data set (8). Runs 31-60 . . . . . | 11 |
| S9  | Comparison of $R_{\text{complete}}$ with $R_{\text{free}}$ , data set (8). Runs 61-90 . . . . . | 12 |
| S10 | Comparison of $R_{\text{complete}}$ with $R_{\text{free}}$ , data set (2) . . . . .             | 13 |
| S11 | Comparison of $R_{\text{complete}}$ with $R_{\text{free}}$ , data set (3) . . . . .             | 14 |
| S12 | $R$ -values for calcuated data . . . . .                                                        | 15 |
| S13 | Data to parameter ratio for data set (6) . . . . .                                              | 17 |
| S14 | Data to parameter ratio for data set (1) . . . . .                                              | 17 |
| S15 | Numerical Values for Fig. S5: 1.10Å . . . . .                                                   | 17 |
| S16 | Numerical Values for Fig. S5: 1.50Å . . . . .                                                   | 18 |
| S17 | Numerical Values for Fig. S5: 1.90Å . . . . .                                                   | 18 |
| S18 | Numerical Values for Fig. S5: 2.30Å . . . . .                                                   | 18 |
| S19 | Numerical Values for Fig. S5: 2.70Å . . . . .                                                   | 19 |
| S20 | Numerical Values for Fig. S5: 3.10Å . . . . .                                                   | 19 |
| S21 | Numerical Values for Fig. S5: 0.44Å . . . . .                                                   | 20 |
| S22 | Numerical Values for Fig. S5: 0.55Å . . . . .                                                   | 20 |
| S23 | Numerical Values for Fig. S5: 0.70Å . . . . .                                                   | 21 |
| S24 | Numerical Values for Fig. S5: 1.20Å . . . . .                                                   | 21 |
| S25 | Numerical Values for Fig. S5: 1.80Å . . . . .                                                   | 21 |
| S26 | Numerical Values for Fig. S5: 2.10Å . . . . .                                                   | 22 |
| S27 | Convergence rate of $R_{\text{complete}}$ . . . . .                                             | 23 |
| S28 | Data statistics for data set (8). . . . .                                                       | 24 |
| S29 | Data statistics for insulin data set (6) . . . . .                                              | 24 |
| S30 | Example Output from the program CrossCheck . . . . .                                            | 29 |

**List of Figures**

|    |                                                                                                |    |
|----|------------------------------------------------------------------------------------------------|----|
| S1 | $R_{\text{complete}}$ and $\langle R_{\text{free}} \rangle$ for small test sets (5) . . . . .  | 5  |
| S2 | $R_{\text{complete}}$ and $\langle R_{\text{free}} \rangle$ for small test sets (6') . . . . . | 6  |
| S3 | $R_{\text{complete}}$ produces less biased electron density . . . . .                          | 14 |
| S4 | Molecule destruction by parameter perturbation . . . . .                                       | 15 |
| S5 | Parameter perturbation does not reduce overfitting . . . . .                                   | 16 |
| S6 | Convergence rate of $R_{\text{complete}}$ . . . . .                                            | 22 |

# 1 Numerical Results for the various Experiments of the Main Article

The Supplemental Information describes the implementation details for the main manuscript on “A new Method to compute  $R_{\text{complete}}$  enables Maximum Likelihood Refinement for Small Data Sets”. It describes which programs were used and, to as great an extent as reasonable, their parameter settings. The Supplemental Material contains the numerical values and some graphical representation supporting the results presented in the main manuscript and several of the scripts that were used to run the experimental refinement and to calculate statistical values. Throughout this work,  $R1$  is always calculated from the working set of reflections, *i.e.* in cases where a test set  $T$  is present,  $H$  must be replaced with  $H \setminus T$  in Eq. 1 of the main manuscript.

## 1.1 Data Preparation and Calculation of $R_{\text{complete}}$

The program `crossflaghkl`, written by TG, partitions a data set of merged data. It reads in the data file in SHELXL HKLF3 or HKLF4 format [1]. The size of test sets is determined by the command line `-t`. Its integer parameter sets the number of flagged reflections per file. If  $|T_i|$  does not divide  $|H|$ , the number of unique reflections, the remaining reflections are flagged in the last file. The output are thus  $\lceil |H|/|T_i| \rceil$  hkl-files each so that each reflection of the input data file is flagged exactly once in the total of all output files.

If the input file contains Bijvoet pairs, *i.e.* reflections  $hkl$  and  $-h-k-l$ , either both reflections are flagged or neither per output file.  $|T_i|$  is counted with Bijvoet pairs counted as one reflection as they are not independent.

The structural model is refined against all data to convergence. Convergence is monitored by three values printed in the SHELXL log-file: The  $wR2$  value, the maximum coordinate shift and the maximum shift of a  $U$ -value. The SHELXL `WIGL` command causes random parameter perturbation as described in the main manuscript. The first parameter applies to the coordinates, the second parameter applies to the isotropic or anisotropic atomic displacement parameters. If one or both parameters are negative, the random shifts will be different each time SHELXL is run.

The resulting parameter file, the *res*-file, serves as input *ins*-file for the calculation of  $R_{\text{complete}}$  with the following modifications

1. The parameter `"-1"` is added to the `"L.S."` or `"CGLS"` command respectively, causing the reflections in the test set to be excluded from refinement. As of version 2014/8, it also causes the numerator and the denominator of Eq. 3 to be printed in the log-file.  $R_{\text{complete}}$  can be conveniently calculated by summing all the numerators and all the denominators from all log-files and computing their ratio.
2. The command `LIST 9` is added. This causes the creation of a cif-file with the observed and calculated structure factor amplitudes for all reflections contained in the test set. The resulting cif-files can be concatenated with linear scaling to the maximum amplitude  $F_{\text{calc}}$  to create a cif-file in "LIST 6" format. This can be represented as electron density map by Coot [2].

Table S1: Numerical results for the values of  $R_{\text{complete}}$ ,  $\langle R_{\text{free}} \rangle$  and  $R_{\text{boot}}$  depending on the set size  $|T_i|$  shown in Fig. S1. Data set (5). Bootstrapping with 5000 replications.  $\min = \min(R_{\text{free}})$ ,  $\max = \max(R_{\text{free}})$ .

| $ T_i $ | #files | $R_{\text{complete}}$ | $\langle R_{\text{free}} \rangle$ | $\sigma(R_{\text{free}})$ | $\langle R1 \rangle$ | $\sigma(R1)$ | min    | max    | $R_{\text{boot}}$ | $\sigma(R_{\text{boot}})$ |
|---------|--------|-----------------------|-----------------------------------|---------------------------|----------------------|--------------|--------|--------|-------------------|---------------------------|
| 1       | 7800   | 0.1651                | 0.2316                            | 0.3085                    | 0.1424               | 0.0001       | 0.0000 | 9.6770 | 0.2316            | 0.0035                    |
| 5       | 1560   | 0.1650                | 0.1788                            | 0.0877                    | 0.1410               | 0.0001       | 0.0127 | 0.9584 | 0.1788            | 0.0022                    |
| 10      | 780    | 0.1650                | 0.1720                            | 0.0603                    | 0.1421               | 0.0001       | 0.0417 | 0.4927 | 0.1720            | 0.0021                    |
| 15      | 520    | 0.1650                | 0.1699                            | 0.0506                    | 0.1421               | 0.0001       | 0.0681 | 0.4209 | 0.1699            | 0.0022                    |
| 20      | 390    | 0.1650                | 0.1689                            | 0.0426                    | 0.1421               | 0.0001       | 0.0768 | 0.3483 | 0.1689            | 0.0022                    |
| 25      | 312    | 0.1652                | 0.1676                            | 0.0388                    | 0.1421               | 0.0002       | 0.0807 | 0.3227 | 0.1676            | 0.0022                    |
| 30      | 260    | 0.1652                | 0.1673                            | 0.0347                    | 0.1421               | 0.0002       | 0.0906 | 0.2793 | 0.1673            | 0.0022                    |
| 35      | 223    | 0.1652                | 0.1670                            | 0.0332                    | 0.1421               | 0.0002       | 0.1035 | 0.2848 | 0.1670            | 0.0023                    |
| 40      | 195    | 0.1652                | 0.1668                            | 0.0292                    | 0.1421               | 0.0002       | 0.1087 | 0.2611 | 0.1668            | 0.0021                    |
| 45      | 174    | 0.1651                | 0.1664                            | 0.0280                    | 0.1421               | 0.0002       | 0.1012 | 0.2450 | 0.1664            | 0.0021                    |
| 50      | 156    | 0.1654                | 0.1665                            | 0.0260                    | 0.1421               | 0.0002       | 0.1075 | 0.2500 | 0.1654            | 0.0015                    |
| 75      | 104    | 0.1652                | 0.1658                            | 0.0192                    | 0.1423               | 0.0002       | 0.1301 | 0.2217 | 0.1658            | 0.0019                    |
| 100     | 78     | 0.1656                | 0.1660                            | 0.0165                    | 0.1423               | 0.0003       | 0.1326 | 0.2051 | 0.1660            | 0.0019                    |
| 150     | 52     | 0.1641                | 0.1637                            | 0.0128                    | 0.1405               | 0.0003       | 0.1396 | 0.1411 | 0.1637            | 0.0018                    |
| 500     | 16     | 0.1661                | 0.1663                            | 0.0053                    | 0.1423               | 0.0007       | 0.1554 | 0.1767 | 0.1663            | 0.0013                    |

- As the input parameters stem from a converged refinement run, the number of refinement cycles can usually be reduced to reduce the overall computation time.

The refinement runs were computed in parallel on nine i7 quad-core computers with 2.67 GHz – 2.93 GHz. Jobs were distributed with the `parallel` script from the GNU Software Foundation. In most cases, with proper balancing between the size of the test set and the computation time,  $R_{\text{complete}}$  can be calculated on such a setup within 10–20min.

Mean values and standard deviations were calculated using either GNU `octave` or R. R was also used for the bootstrapping *e.g.* for  $R_{\text{boot}}$ .

## 1.2 Stability with respect to the Test Set Size

For both data sets (5) and (6'), the program parameter `-t` for the program `crossflaghkl` was set to the values listed in Tables S1 and Tables S2. The results are shown as graphs in Figs. S1 and S2.

## 1.3 Stability of $R_{\text{complete}}$ with Partition

The average values presented in Tab. 4 of the main text were derived in the following way:

The structural model for data set (6') was refined with `SHELXL-2014/8` with 1000 cycles of conjugate gradient least squares. The position of side chain Lys B29 was not well defined. To avoid fluctuation due to unstable residues, it was removed. The program `crossflaghkl` was applied 20 times to data set (6') with `-t50` to create test sets of size  $|T_i| = 50$ . Thus each time 131 data files were created of which in the last one only 46 reflections were flagged.  $R_{\text{complete}}$ ,  $\langle R1 \rangle$ , and

Figure S1: Variation of  $R_{\text{complete}}$  and  $\langle R_{\text{free}} \rangle$  depending on test set size  $|T_i|$ , data set (5). (A)  $R_{\text{complete}}$  is basically constant over the entire range of  $|T_i|$  while  $\langle R_{\text{free}} \rangle$  and its standard deviation vary greatly the smaller the test set size  $|T_i|$ .  $\sigma_{\text{est}} = R_{\text{free}} / \sqrt{2|T_i|}$  for comparison [3]. (B)  $\langle R_{\text{free}} \rangle$  as in (A) with minimal and maximal values on logarithmic scale. Large outliers occur with small set size  $|T_i|$ .

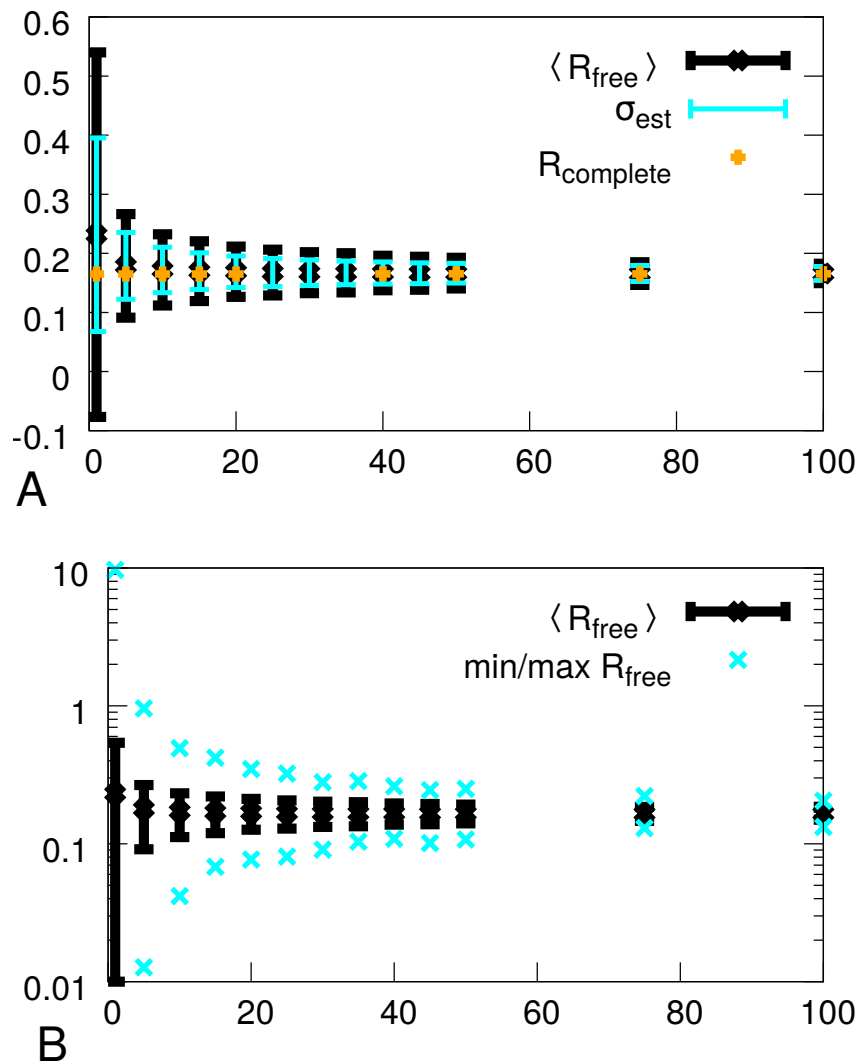

Figure S2: Same as Fig. S1 for data set (6'). The results are similar to those for data set (5).

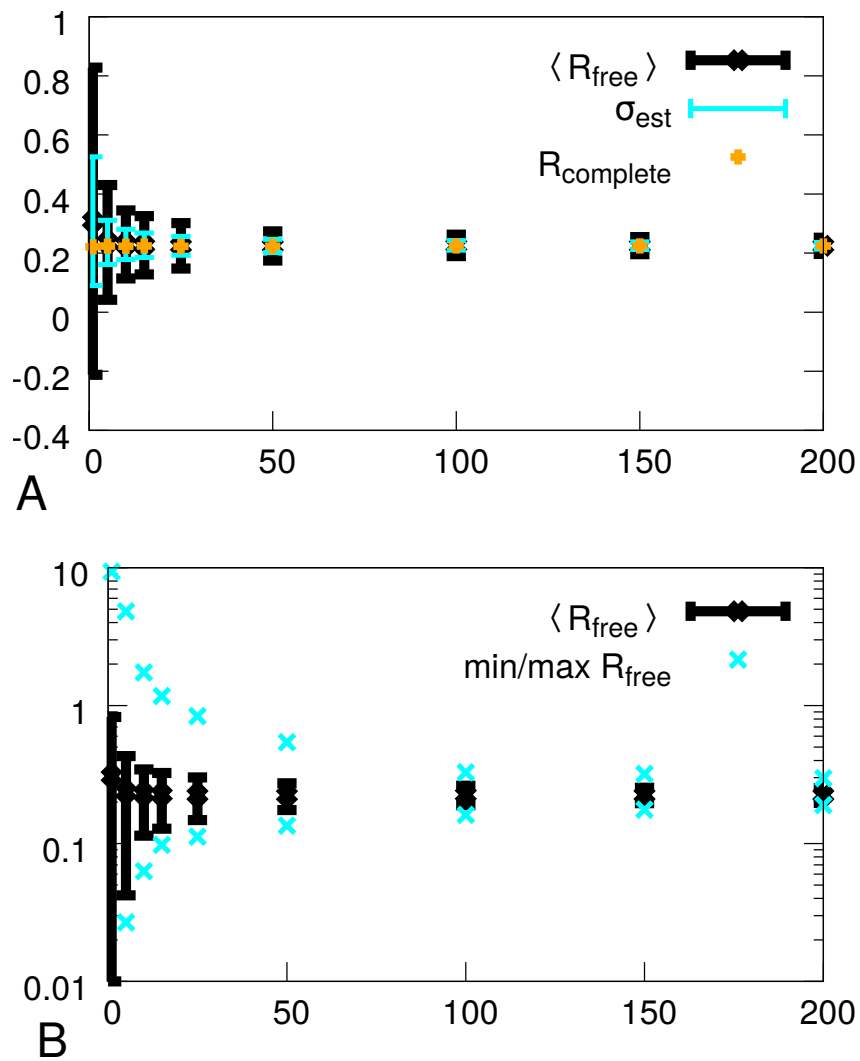

Table S2: Same as Table S1 corresponding to Fig. S2 for data set (6').

| $ T_i $ | #files | $R_{\text{complete}}$ | $\langle R_{\text{free}} \rangle$ | $\sigma(R_{\text{free}})$ | $\langle R1 \rangle$ | $\sigma(R1)$ | min     | max    | $R_{\text{boot}}$ | $\sigma(R_{\text{boot}})$ |
|---------|--------|-----------------------|-----------------------------------|---------------------------|----------------------|--------------|---------|--------|-------------------|---------------------------|
| 1       | 6533   | 0.2212                | 0.3079                            | 0.5198                    | 0.1931               | 0.0001       | 0.0000  | 9.3666 | 0.3079            | 0.0063                    |
| 5       | 1307   | 0.2237                | 0.2362                            | 0.1942                    | 0.1941               | 0.0006       | 0.02680 | 4.8190 | 0.2362            | 0.0054                    |
| 10      | 654    | 0.2233                | 0.2293                            | 0.1153                    | 0.1942               | 0.0006       | 0.06290 | 1.7404 | 0.2293            | 0.0045                    |
| 15      | 436    | 0.2242                | 0.2265                            | 0.0985                    | 0.1941               | 0.0006       | 0.09780 | 1.1728 | 0.2265            | 0.0047                    |
| 25      | 262    | 0.2230                | 0.2247                            | 0.0768                    | 0.1940               | 0.0006       | 0.11210 | 0.8387 | 0.2252            | 0.0047                    |
| 50      | 131    | 0.2234                | 0.2242                            | 0.0493                    | 0.1941               | 0.0008       | 0.13470 | 0.5426 | 0.2242            | 0.0042                    |
| 100     | 66     | 0.2242                | 0.2261                            | 0.0364                    | 0.1941               | 0.0009       | 0.15570 | 0.3316 | 0.2261            | 0.0045                    |
| 150     | 44     | 0.2243                | 0.2251                            | 0.0290                    | 0.1940               | 0.0010       | 0.17610 | 0.3193 | 0.2251            | 0.0044                    |
| 200     | 33     | 0.2241                | 0.2246                            | 0.0276                    | 0.1939               | 0.0011       | 0.19010 | 0.2980 | 0.2245            | 0.0047                    |
| 500     | 14     | 0.2261                | 0.2239                            | 0.0170                    | 0.1934               | 0.0016       | 0.19310 | 0.2450 | 0.2239            | 0.0043                    |

$\langle R_{\text{free}} \rangle$  were calculated from the values listed in the 131 SHELXL log-files. The average value and standard deviation were calculated with R from the values listed in Table S3.

#### 1.4 Validation: How “free” is $R_{\text{complete}}$

We created two different types of experiments that allow the calculation of a bias-free  $R_{\text{free}}$  value within an acceptable amount of time and with an acceptable small amount of user interference. This allowed us to compare  $R_{\text{complete}}$  with proper cross-validation and assess the bias of  $R_{\text{complete}}$ . We used the macromolecular data set (8) and the two small molecule data sets (2) and (3).

##### 1.4.1 Elastase data set (8)

`crossflaghkl -t1000` created 90 data files from the merged data file for (8). Flagged reflections extracted with GNU `grep` and remove with GNU `sed`. `shelxc` [4] extracted the anomalous information from each working `hkl`-file and created the `shelxd ins`-file from the input

```
CELL 49.704      57.895      74.169      90.000      90.000      90
SPAG P212121
FIND 12
NTRY 200
SFAC S
SAD ${1}
```

`shelxe` was run from the command line with

```
shelxe kcross_set0000 kcross_set0000_fa -a -h -q
```

If the correlation coefficient between the resulting structure and the data were less than 25%, the hand needed to be inverted with the additional command line switch `-i`. The working `hkl`-file, the correct `shelxe` output PDB-file, and the amino acid sequence for porcine elastase were feed into `phenix` [5] for autobuilding. The input script was created with default options from the `phenix`

Table S3: Variation of  $R_{\text{complete}}$  with choice of partition:  $R$ -values for the structural model from data set (6') from 20 different partitionings of the data set.

| run | $R_{\text{complete}}$ | $\langle R1 \rangle$ | $\sigma(R1)$ | $\langle R_{\text{free}} \rangle$ | $\sigma(R_{\text{free}})$ |
|-----|-----------------------|----------------------|--------------|-----------------------------------|---------------------------|
| 1   | 0.218914              | 0.21995              | 0.04882      | 0.19293                           | 0.00038                   |
| 2   | 0.219109              | 0.21917              | 0.04957      | 0.19293                           | 0.00039                   |
| 3   | 0.219369              | 0.22088              | 0.04795      | 0.19293                           | 0.00036                   |
| 4   | 0.219260              | 0.21983              | 0.04608      | 0.19293                           | 0.00040                   |
| 5   | 0.219335              | 0.22076              | 0.05326      | 0.19293                           | 0.00040                   |
| 6   | 0.219405              | 0.21921              | 0.04596      | 0.19293                           | 0.00040                   |
| 7   | 0.219059              | 0.22105              | 0.05478      | 0.19293                           | 0.00039                   |
| 8   | 0.219203              | 0.21955              | 0.04913      | 0.19293                           | 0.00040                   |
| 9   | 0.219520              | 0.21992              | 0.05056      | 0.19293                           | 0.00040                   |
| 10  | 0.219035              | 0.22066              | 0.05549      | 0.19293                           | 0.00041                   |
| 11  | 0.219133              | 0.22034              | 0.05682      | 0.19293                           | 0.00044                   |
| 12  | 0.218931              | 0.21983              | 0.04583      | 0.19293                           | 0.00038                   |
| 13  | 0.218856              | 0.21936              | 0.04695      | 0.19293                           | 0.00040                   |
| 14  | 0.219205              | 0.21894              | 0.04817      | 0.19294                           | 0.00038                   |
| 15  | 0.219282              | 0.21942              | 0.04477      | 0.19293                           | 0.00040                   |
| 16  | 0.219055              | 0.22055              | 0.05555      | 0.19293                           | 0.00045                   |
| 17  | 0.219000              | 0.21949              | 0.04287      | 0.19293                           | 0.00036                   |
| 18  | 0.219192              | 0.22042              | 0.05299      | 0.19293                           | 0.00043                   |
| 19  | 0.219632              | 0.22033              | 0.04851      | 0.19293                           | 0.00041                   |
| 20  | 0.219429              | 0.22143              | 0.05139      | 0.19294                           | 0.00040                   |

Table S4: Variation of  $R_{\text{complete}}$  with choice of partition:  $R$ -values for the structural model from data set (4) from 20 different partitionings of the data set.

| run | $R_{\text{complete}}$ | $\langle R1 \rangle$ | $\sigma(R1)$ | $\langle R_{\text{free}} \rangle$ | $\sigma(R_{\text{free}})$ |
|-----|-----------------------|----------------------|--------------|-----------------------------------|---------------------------|
| 1   | 0.0487855             | 0.04917              | 0.00948      | 0.04717                           | 0.00031                   |
| 2   | 0.0488132             | 0.04924              | 0.00873      | 0.04720                           | 0.00043                   |
| 3   | 0.0487572             | 0.04935              | 0.01034      | 0.04715                           | 0.00009                   |
| 4   | 0.0488095             | 0.04932              | 0.00970      | 0.04720                           | 0.00042                   |
| 5   | 0.0487755             | 0.04928              | 0.00970      | 0.04717                           | 0.00032                   |
| 6   | 0.0489851             | 0.04944              | 0.00844      | 0.04739                           | 0.00157                   |
| 7   | 0.0488751             | 0.04933              | 0.01039      | 0.04723                           | 0.00053                   |
| 8   | 0.0488803             | 0.04937              | 0.00989      | 0.04729                           | 0.00115                   |
| 9   | 0.0488193             | 0.04890              | 0.00983      | 0.04727                           | 0.00112                   |
| 10  | 0.048789              | 0.04920              | 0.00883      | 0.04724                           | 0.00108                   |
| 11  | 0.0488365             | 0.04910              | 0.00948      | 0.04720                           | 0.00044                   |
| 12  | 0.048754              | 0.04905              | 0.00859      | 0.04717                           | 0.00031                   |
| 13  | 0.0488031             | 0.04888              | 0.00929      | 0.04720                           | 0.00043                   |
| 14  | 0.0488888             | 0.04942              | 0.00996      | 0.04724                           | 0.00109                   |
| 15  | 0.0487907             | 0.04902              | 0.01000      | 0.04723                           | 0.00052                   |
| 16  | 0.0490973             | 0.04967              | 0.00988      | 0.04742                           | 0.00160                   |
| 17  | 0.0490789             | 0.04941              | 0.00856      | 0.04745                           | 0.00160                   |
| 18  | 0.0488278             | 0.04936              | 0.00859      | 0.04727                           | 0.00110                   |
| 19  | 0.0489831             | 0.04952              | 0.00965      | 0.04751                           | 0.00190                   |
| 20  | 0.04878               | 0.04924              | 0.00978      | 0.04718                           | 0.00032                   |



Table S5: Variation of  $R_{\text{complete}}$  with choice of partition:  $R$ -values for the structural model from data set (7) from 20 different partitionings of the data set.

| run | $R_{\text{complete}}$ | $\langle R1 \rangle$ | $\sigma(R1)$ | $\langle R_{\text{free}} \rangle$ | $\sigma(R_{\text{free}})$ |
|-----|-----------------------|----------------------|--------------|-----------------------------------|---------------------------|
| 1   | 0.327948              | 0.32853              | 0.03824      | 0.26755                           | 0.00082                   |
| 2   | 0.325835              | 0.32699              | 0.04560      | 0.26758                           | 0.00088                   |
| 3   | 0.325369              | 0.32586              | 0.04373      | 0.26753                           | 0.00082                   |
| 4   | 0.325369              | 0.32586              | 0.04373      | 0.26753                           | 0.00082                   |
| 5   | 0.326309              | 0.32745              | 0.04618      | 0.26765                           | 0.00092                   |
| 6   | 0.326309              | 0.32745              | 0.04618      | 0.26765                           | 0.00092                   |
| 7   | 0.325754              | 0.32696              | 0.04445      | 0.26771                           | 0.00091                   |
| 8   | 0.327227              | 0.32824              | 0.05236      | 0.26761                           | 0.00106                   |
| 9   | 0.327227              | 0.32824              | 0.05236      | 0.26761                           | 0.00106                   |
| 10  | 0.326709              | 0.32761              | 0.04420      | 0.26765                           | 0.00086                   |
| 11  | 0.326709              | 0.32761              | 0.04420      | 0.26765                           | 0.00086                   |
| 12  | 0.325287              | 0.32568              | 0.04158      | 0.26758                           | 0.00081                   |
| 13  | 0.325287              | 0.32568              | 0.04158      | 0.26758                           | 0.00081                   |
| 14  | 0.327452              | 0.32851              | 0.04889      | 0.26763                           | 0.00091                   |
| 15  | 0.326034              | 0.32701              | 0.04359      | 0.26764                           | 0.00085                   |
| 16  | 0.326034              | 0.32701              | 0.04359      | 0.26764                           | 0.00085                   |
| 17  | 0.327733              | 0.32806              | 0.04609      | 0.26752                           | 0.00088                   |
| 18  | 0.327733              | 0.32806              | 0.04609      | 0.26752                           | 0.00088                   |
| 19  | 0.326032              | 0.32670              | 0.04587      | 0.26758                           | 0.00090                   |
| 20  | 0.326032              | 0.32670              | 0.04587      | 0.26758                           | 0.00090                   |

Table S6: Mean values and standard deviations of  $R_{\text{complete}}$ ,  $R_{\text{free}}$ , and  $R1$  from twenty different partitions for the three data set (6'), (7), and (4).  $|T_i| = 50$  in all three cases.

| ID   | $\langle R_{\text{complete}} \rangle$ | $\sigma(R_{\text{complete}})$ | $\langle R_{\text{free}} \rangle$ | $\sigma(R_{\text{free}})$ | $\langle R1 \rangle$ | $\sigma(R1)$ |
|------|---------------------------------------|-------------------------------|-----------------------------------|---------------------------|----------------------|--------------|
| (6') | 0.2192                                | 0.0002                        | 0.2201                            | 0.0007                    | 0.199293             | 0.000003     |
| (4)  | 0.0488                                | 0.0001                        | 0.0493                            | 0.0002                    | 0.0472               | 0.0001       |
| (7)  | 0.3264                                | 0.0009                        | 0.3272                            | 0.0009                    | 0.26760              | 0.00005      |

Table S7: Comparison of  $R_{\text{complete}}$  with  $R_{\text{free}}$ , data set (8). Runs 1-30

| run | $R1$   | $R_{\text{free}}$ | $R_{\text{complete}}$ | $\langle R1 \rangle$ | $\sigma(R1)$ | $\langle R_{\text{free}} \rangle$ | $\sigma(R_{\text{free}})$ | $\langle \Delta\Phi \rangle [^\circ]$ |
|-----|--------|-------------------|-----------------------|----------------------|--------------|-----------------------------------|---------------------------|---------------------------------------|
| 01  | 0.3250 | 0.3761            | 0.3628                | 0.3249               | 0.0003       | 0.3630                            | 0.0169                    | 35.456                                |
| 02  | 0.3026 | 0.3584            | 0.3381                | 0.3029               | 0.0002       | 0.3382                            | 0.0160                    | 31.280                                |
| 03  | 0.2933 | 0.3234            | 0.3292                | 0.2933               | 0.0002       | 0.3293                            | 0.0171                    | 30.434                                |
| 04  | 0.3102 | 0.3704            | 0.3470                | 0.3101               | 0.0002       | 0.3473                            | 0.0160                    | 32.947                                |
| 05  | 0.3011 | 0.3557            | 0.3370                | 0.3010               | 0.0002       | 0.3372                            | 0.0151                    | 31.208                                |
| 06  | 0.3128 | 0.3350            | 0.3514                | 0.3127               | 0.0002       | 0.3517                            | 0.0165                    | 33.455                                |
| 07  | 0.3146 | 0.3692            | 0.3513                | 0.3129               | 0.0003       | 0.3515                            | 0.0174                    | 33.378                                |
| 08  | 0.3142 | 0.3259            | 0.3504                | 0.3135               | 0.0002       | 0.3505                            | 0.0177                    | 33.047                                |
| 09  | 0.3002 | 0.3197            | 0.3352                | 0.3000               | 0.0002       | 0.3354                            | 0.0167                    | 31.074                                |
| 10  | 0.2952 | 0.3324            | 0.3307                | 0.2950               | 0.0003       | 0.3309                            | 0.0161                    | 30.575                                |
| 11  | 0.3068 | 0.3512            | 0.3445                | 0.3070               | 0.0002       | 0.3448                            | 0.0175                    | 32.095                                |
| 12  | 0.3248 | 0.3904            | 0.3624                | 0.3251               | 0.0002       | 0.3628                            | 0.0178                    | 34.989                                |
| 13  | 0.2907 | 0.3286            | 0.3251                | 0.2903               | 0.0002       | 0.3252                            | 0.0167                    | 29.678                                |
| 14  | 0.2979 | 0.3644            | 0.3344                | 0.2981               | 0.0002       | 0.3347                            | 0.0159                    | 31.076                                |
| 15  | 0.2940 | 0.3197            | 0.3296                | 0.2924               | 0.0002       | 0.3298                            | 0.0157                    | 30.623                                |
| 16  | 0.3223 | 0.3649            | 0.3594                | 0.3221               | 0.0002       | 0.3595                            | 0.0159                    | 35.178                                |
| 17  | 0.3079 | 0.3550            | 0.3460                | 0.3081               | 0.0002       | 0.3462                            | 0.0160                    | 32.935                                |
| 18  | 0.3203 | 0.3695            | 0.3576                | 0.3200               | 0.0003       | 0.3578                            | 0.0170                    | 34.497                                |
| 19  | 0.2966 | 0.3361            | 0.3339                | 0.2965               | 0.0006       | 0.3342                            | 0.0137                    | 30.482                                |
| 20  | 0.3044 | 0.3481            | 0.3405                | 0.3038               | 0.0003       | 0.3407                            | 0.0177                    | 31.827                                |
| 21  | 0.2871 | 0.3175            | 0.3207                | 0.2864               | 0.0003       | 0.3208                            | 0.0125                    | 29.175                                |
| 22  | 0.3050 | 0.3353            | 0.3419                | 0.3046               | 0.0003       | 0.3422                            | 0.0160                    | 31.868                                |
| 23  | 0.3374 | 0.3723            | 0.3771                | 0.3371               | 0.0002       | 0.3773                            | 0.0148                    | 37.658                                |
| 24  | 0.3071 | 0.3639            | 0.3445                | 0.3072               | 0.0002       | 0.3449                            | 0.0169                    | 31.992                                |
| 25  | 0.2914 | 0.3316            | 0.3260                | 0.2914               | 0.0002       | 0.3260                            | 0.0174                    | 29.399                                |
| 26  | 0.2871 | 0.3397            | 0.3235                | 0.2870               | 0.0002       | 0.3237                            | 0.0156                    | 29.362                                |
| 27  | 0.3082 | 0.3331            | 0.3454                | 0.3080               | 0.0002       | 0.3455                            | 0.0157                    | 32.199                                |
| 28  | 0.3166 | 0.3439            | 0.3529                | 0.3156               | 0.0002       | 0.3530                            | 0.0152                    | 33.818                                |
| 29  | 0.2832 | 0.3262            | 0.3169                | 0.2817               | 0.0003       | 0.3170                            | 0.0178                    | 29.105                                |
| 30  | 0.3181 | 0.3571            | 0.3569                | 0.3179               | 0.0002       | 0.3569                            | 0.0145                    | 33.554                                |

GUI for one case. Output PDB-files did not always match and were thus superpositioned with `lsqman` [6]. PDB-files were converted to SHELXL `ins`-files with `shelxpro`. Refinement of each of the 90 structures against their respective working data set with 200 cycles of conjugate gradient least squares minimization. Bijvoet pairs were merged during refinement. The output `res` file served as input for calculating  $R1$  against the respective test sets as real  $R_{\text{free}}$  free from overfitting.

The results are shown in Tables S7–S9, split in 30 runs per table.  $R1$  is calculated against the working set from the structural model used as input to the calculation of  $R_{\text{complete}}$ ,  $R_{\text{free}}$  is calculated from the same structural model against the respective training set.

The average phase difference  $\langle \Delta\Phi \rangle$  in degrees of calculated phases between the respective model and a fully refined model of Elastase was calculated with the program `phistats` [7]. The correlation coefficients between  $\langle \Delta\Phi \rangle$  and  $R1$ ,  $R_{\text{free}}$  and  $R_{\text{complete}}$  respectively were calculated with the program `GNU octave`.

Table S8: Comparison of  $R_{\text{complete}}$  with  $R_{\text{free}}$ , data set (8). Runs 31–60

| run | $R1$   | $R_{\text{free}}$ | $R_{\text{complete}}$ | $\langle R1 \rangle$ | $\sigma(R1)$ | $\langle R_{\text{free}} \rangle$ | $\sigma(R_{\text{free}})$ | $\langle \Delta\Phi \rangle [^\circ]$ |
|-----|--------|-------------------|-----------------------|----------------------|--------------|-----------------------------------|---------------------------|---------------------------------------|
| 31  | 0.3108 | 0.3462            | 0.3478                | 0.3109               | 0.0002       | 0.3478                            | 0.0154                    | 32.771                                |
| 32  | 0.3208 | 0.3553            | 0.3591                | 0.3207               | 0.0002       | 0.3594                            | 0.0165                    | 34.483                                |
| 33  | 0.3132 | 0.3349            | 0.3515                | 0.3131               | 0.0002       | 0.3521                            | 0.0176                    | 33.823                                |
| 34  | 0.3155 | 0.3547            | 0.3523                | 0.3157               | 0.0002       | 0.3524                            | 0.0164                    | 33.162                                |
| 35  | 0.3037 | 0.3626            | 0.3429                | 0.3038               | 0.0003       | 0.3431                            | 0.0152                    | 31.607                                |
| 36  | 0.2863 | 0.3391            | 0.3180                | 0.2831               | 0.0003       | 0.3181                            | 0.0149                    | 28.777                                |
| 37  | 0.3209 | 0.4016            | 0.3580                | 0.3213               | 0.0002       | 0.3581                            | 0.0183                    | 34.699                                |
| 38  | 0.3108 | 0.3395            | 0.3459                | 0.3102               | 0.0002       | 0.3459                            | 0.0169                    | 32.490                                |
| 39  | 0.3093 | 0.3604            | 0.3456                | 0.3083               | 0.0002       | 0.3459                            | 0.0178                    | 32.655                                |
| 40  | 0.2932 | 0.3251            | 0.3274                | 0.2921               | 0.0003       | 0.3275                            | 0.0162                    | 30.561                                |
| 41  | 0.2856 | 0.3230            | 0.3198                | 0.2854               | 0.0002       | 0.3203                            | 0.0170                    | 29.078                                |
| 42  | 0.2973 | 0.3611            | 0.3337                | 0.2969               | 0.0002       | 0.3338                            | 0.0156                    | 30.444                                |
| 43  | 0.3056 | 0.3337            | 0.3416                | 0.3055               | 0.0002       | 0.3418                            | 0.0162                    | 31.935                                |
| 44  | 0.2980 | 0.3123            | 0.3313                | 0.2947               | 0.0003       | 0.3315                            | 0.0187                    | 30.707                                |
| 45  | 0.3104 | 0.3639            | 0.3484                | 0.3104               | 0.0002       | 0.3485                            | 0.0154                    | 33.249                                |
| 46  | 0.3111 | 0.3448            | 0.3475                | 0.3107               | 0.0002       | 0.3475                            | 0.0165                    | 33.154                                |
| 47  | 0.3233 | 0.3870            | 0.3628                | 0.3226               | 0.0003       | 0.3629                            | 0.0154                    | 35.039                                |
| 48  | 0.3336 | 0.4144            | 0.3740                | 0.3332               | 0.0003       | 0.3743                            | 0.0166                    | 36.804                                |
| 49  | 0.2976 | 0.3174            | 0.3339                | 0.2966               | 0.0002       | 0.3339                            | 0.0131                    | 30.533                                |
| 50  | 0.3407 | 0.3893            | 0.3809                | 0.3409               | 0.0003       | 0.3810                            | 0.0177                    | 37.634                                |
| 51  | 0.3180 | 0.3536            | 0.3565                | 0.3181               | 0.0002       | 0.3567                            | 0.0140                    | 33.937                                |
| 52  | 0.2997 | 0.3532            | 0.3362                | 0.2999               | 0.0002       | 0.3362                            | 0.0181                    | 31.292                                |
| 53  | 0.3011 | 0.3124            | 0.3375                | 0.3009               | 0.0002       | 0.3374                            | 0.0152                    | 31.458                                |
| 54  | 0.3020 | 0.3381            | 0.3376                | 0.3018               | 0.0002       | 0.3377                            | 0.0161                    | 31.266                                |
| 55  | 0.3238 | 0.3626            | 0.3633                | 0.3239               | 0.0002       | 0.3634                            | 0.0149                    | 34.836                                |
| 56  | 0.2941 | 0.3381            | 0.3305                | 0.2943               | 0.0003       | 0.3307                            | 0.0183                    | 30.714                                |
| 57  | 0.3232 | 0.4106            | 0.3627                | 0.3233               | 0.0002       | 0.3630                            | 0.0158                    | 35.207                                |
| 58  | 0.3264 | 0.3681            | 0.3659                | 0.3261               | 0.0003       | 0.3660                            | 0.0163                    | 35.515                                |
| 59  | 0.2968 | 0.3426            | 0.3321                | 0.2970               | 0.0002       | 0.3322                            | 0.0174                    | 30.125                                |
| 60  | 0.3182 | 0.3659            | 0.3571                | 0.3177               | 0.0004       | 0.3571                            | 0.0158                    | 34.369                                |

Table S9: Comparison of  $R_{\text{complete}}$  with  $R_{\text{free}}$ , data set (8). Runs 61–90

| run | $R1$   | $R_{\text{free}}$ | $R_{\text{complete}}$ | $\langle R1 \rangle$ | $\sigma(R1)$ | $\langle R_{\text{free}} \rangle$ | $\sigma(R_{\text{free}})$ | $\langle \Delta\Phi \rangle [^\circ]$ |
|-----|--------|-------------------|-----------------------|----------------------|--------------|-----------------------------------|---------------------------|---------------------------------------|
| 61  | 0.3032 | 0.3338            | 0.3380                | 0.3029               | 0.0002       | 0.3384                            | 0.0164                    | 31.651                                |
| 62  | 0.3180 | 0.3561            | 0.3546                | 0.3177               | 0.0004       | 0.3547                            | 0.0169                    | 33.420                                |
| 63  | 0.3337 | 0.3768            | 0.3720                | 0.3338               | 0.0002       | 0.3719                            | 0.0174                    | 36.172                                |
| 64  | 0.3192 | 0.3936            | 0.3590                | 0.3197               | 0.0002       | 0.3592                            | 0.0158                    | 34.692                                |
| 65  | 0.2897 | 0.3503            | 0.3254                | 0.2898               | 0.0002       | 0.3255                            | 0.0141                    | 29.600                                |
| 66  | 0.2881 | 0.3463            | 0.3234                | 0.2882               | 0.0002       | 0.3238                            | 0.0161                    | 29.025                                |
| 67  | 0.3280 | 0.3579            | 0.3661                | 0.3281               | 0.0002       | 0.3663                            | 0.0153                    | 35.301                                |
| 68  | 0.2913 | 0.3267            | 0.3275                | 0.2918               | 0.0002       | 0.3277                            | 0.0176                    | 30.040                                |
| 69  | 0.3222 | 0.3750            | 0.3618                | 0.3223               | 0.0003       | 0.3621                            | 0.0146                    | 35.024                                |
| 70  | 0.3002 | 0.3199            | 0.3359                | 0.2987               | 0.0002       | 0.3361                            | 0.0156                    | 31.683                                |
| 71  | 0.2853 | 0.3258            | 0.3196                | 0.2848               | 0.0002       | 0.3201                            | 0.0160                    | 29.140                                |
| 72  | 0.3074 | 0.3280            | 0.3460                | 0.3071               | 0.0002       | 0.3462                            | 0.0157                    | 32.168                                |
| 73  | 0.3325 | 0.3739            | 0.3698                | 0.3323               | 0.0002       | 0.3702                            | 0.0157                    | 35.470                                |
| 74  | 0.2957 | 0.3312            | 0.3315                | 0.2956               | 0.0002       | 0.3316                            | 0.0141                    | 30.515                                |
| 75  | 0.2991 | 0.3259            | 0.3350                | 0.2990               | 0.0002       | 0.3352                            | 0.0153                    | 31.083                                |
| 76  | 0.3342 | 0.3579            | 0.3717                | 0.3339               | 0.0002       | 0.3720                            | 0.0154                    | 36.362                                |
| 77  | 0.3150 | 0.3609            | 0.3519                | 0.3149               | 0.0002       | 0.3520                            | 0.0170                    | 33.489                                |
| 78  | 0.3066 | 0.3539            | 0.3427                | 0.3069               | 0.0002       | 0.3430                            | 0.0146                    | 32.284                                |
| 79  | 0.3064 | 0.3460            | 0.3421                | 0.3063               | 0.0002       | 0.3424                            | 0.0173                    | 31.884                                |
| 80  | 0.3031 | 0.3567            | 0.3431                | 0.3029               | 0.0003       | 0.3436                            | 0.0173                    | 32.433                                |
| 81  | 0.3238 | 0.3651            | 0.3602                | 0.3224               | 0.0002       | 0.3604                            | 0.0150                    | 34.599                                |
| 82  | 0.2929 | 0.3154            | 0.3276                | 0.2915               | 0.0002       | 0.3277                            | 0.0148                    | 30.227                                |
| 83  | 0.3082 | 0.3278            | 0.3460                | 0.3078               | 0.0003       | 0.3459                            | 0.0160                    | 32.322                                |
| 84  | 0.3150 | 0.3510            | 0.3523                | 0.3150               | 0.0002       | 0.3526                            | 0.0167                    | 33.583                                |
| 85  | 0.3143 | 0.3623            | 0.3528                | 0.3141               | 0.0003       | 0.3529                            | 0.0162                    | 33.192                                |
| 86  | 0.3139 | 0.3565            | 0.3520                | 0.3140               | 0.0003       | 0.3522                            | 0.0164                    | 33.208                                |
| 87  | 0.3182 | 0.3621            | 0.3559                | 0.3182               | 0.0003       | 0.3561                            | 0.0177                    | 33.614                                |
| 88  | 0.3063 | 0.3665            | 0.3455                | 0.3065               | 0.0003       | 0.3455                            | 0.0152                    | 32.374                                |
| 89  | 0.3260 | 0.3766            | 0.3627                | 0.3260               | 0.0002       | 0.3628                            | 0.0159                    | 35.219                                |
| 90  | 0.3147 | 0.3749            | 0.3510                | 0.3114               | 0.0005       | 0.3513                            | 0.0163                    | 33.205                                |

Table S10: Comparison of  $R_{\text{complete}}$  with  $R_{\text{free}}$ , data set (2). The table is sorted by  $R_{\text{complete}}$  to highlight the bimodal distribution of the  $R_{\text{complete}}$  which is not apparent in the cases of  $R1$  or  $R_{\text{free}}$ .

| run | $R_{\text{complete}}$ | $R1$   | $R_{\text{free}}$ |
|-----|-----------------------|--------|-------------------|
| 12  | 0.120421              | 0.1081 | 0.1322            |
| 19  | 0.120421              | 0.1094 | 0.1148            |
| 1   | 0.120422              | 0.1083 | 0.1273            |
| 13  | 0.120422              | 0.1084 | 0.1379            |
| 16  | 0.120422              | 0.1084 | 0.1352            |
| 15  | 0.120423              | 0.1088 | 0.1286            |
| 18  | 0.120423              | 0.1091 | 0.1171            |
| 10  | 0.120424              | 0.1098 | 0.1102            |
| 2   | 0.120424              | 0.1092 | 0.1101            |
| 6   | 0.120425              | 0.1096 | 0.1017            |
| 14  | 0.120426              | 0.1089 | 0.1126            |
| 7   | 0.120427              | 0.1085 | 0.1258            |
| 17  | 0.120428              | 0.1090 | 0.1166            |
| 4   | 0.120428              | 0.1088 | 0.1248            |
| 3   | 0.121181              | 0.1094 | 0.1257            |
| 8   | 0.121238              | 0.1099 | 0.1229            |
| 11  | 0.121243              | 0.1100 | 0.1223            |
| 20  | 0.121243              | 0.1096 | 0.1192            |
| 5   | 0.121245              | 0.1094 | 0.1293            |
| 9   | 0.121245              | 0.1087 | 0.1389            |

#### 1.4.2 Small Molecule Data Sets (2) & (3)

For the data sets (2) and (3), the data were split into 20 different working/test sets. Structure solution was done with `shelxt`, refinement with `shelxl` with default settings and without any human interference. Numerical results are shown in Table S10 and Table S11.

### 1.5 Validation II: Comparison with Calculated Data

Data were calculated with `xprep` [1] from the two structural models for data sets (4) and (6'). The modifications mentioned in the main text were introduced by manual editing of the `SHELXL ins`-files. Map differences were computed with `Coot` [2]. Fig. S3 shows a stronger signal in the map computed with the  $R_{\text{complete}}$  method than the conventional map. The improvement is consistent for all the introduced modifications. Note that the resulting differences are not due to scaling errors when making the differences: otherwise density would show for the rest of the structural models; this was checked and not found, even at lower contour levels.

Results for  $R_{\text{complete}}$ ,  $\langle R_{\text{free}} \rangle$ , and  $R1$  for the calculated data from the structural models of data sets (6') and (4).  $R1_{\text{ideal}}$ :  $R1$  value calculated after modification of the structure without any refinement. In order to check if parameter perturbation would reduce the gap between  $R1_{\text{ideal}}$  and  $R_{\text{complete}}$ , we tried random parameter perturbation with an amplitude  $X = 0.6$ . This was large enough to move most atoms beyond the radius of convergence. One representative structural model is shown in Fig. S4 and shows why parameter perturbation must be applied with caution, if at all.

Table S11: Comparison of  $R_{\text{complete}}$  with  $R_{\text{free}}$ : Same table as Table S10 but for data set (3). In this case the sorting by  $R_{\text{complete}}$  highlights the two outlier structures in run 8 and run 1.

| run | $R_{\text{complete}}$ | $R_1$  | $R_{\text{free}}$ |
|-----|-----------------------|--------|-------------------|
| 11  | 0.127292              | 0.1139 | 0.1458            |
| 4   | 0.127292              | 0.1136 | 0.1304            |
| 10  | 0.127293              | 0.1143 | 0.1204            |
| 14  | 0.127294              | 0.1135 | 0.1407            |
| 18  | 0.127294              | 0.1133 | 0.1338            |
| 3   | 0.127294              | 0.1147 | 0.1223            |
| 13  | 0.127295              | 0.1144 | 0.1242            |
| 9   | 0.127295              | 0.1134 | 0.1377            |
| 12  | 0.127296              | 0.1152 | 0.1198            |
| 16  | 0.127296              | 0.1153 | 0.1092            |
| 17  | 0.127296              | 0.1140 | 0.1326            |
| 20  | 0.127296              | 0.1151 | 0.1124            |
| 2   | 0.127296              | 0.1145 | 0.1142            |
| 5   | 0.127296              | 0.1145 | 0.1183            |
| 19  | 0.127297              | 0.1141 | 0.1307            |
| 15  | 0.127298              | 0.1146 | 0.1189            |
| 6   | 0.127301              | 0.1137 | 0.1395            |
| 7   | 0.127301              | 0.1137 | 0.1383            |
| 8   | 0.129160              | 0.1145 | 0.1460            |
| 1   | 0.132383              | 0.1196 | 0.1409            |

Figure S3: Difference between the electron density map calculated with  $|F_{\text{calc}}(hkl)|$  produced by the  $R_{\text{complete}}$  method and the electron density map resulting from conventional refinement. A: Data set from (4). The red *aka* negative density indicates that the wrongly placed sodium atom has too many electrons compared to the oxygen atom contained in the ideal model. The green *aka* positive density patches nearby are most likely Fourier ripples. B: Data set from (6'). The green *aka* positive density sphere show the positions of the oxygen atoms removed from the structural model used to calculate the data. Note the cyan circles: as opposed to the left panel the difference of three electrons per sodium atoms that wrongly replaced an oxygen atom does not stand out against the eight electrons of the missing oxygens.

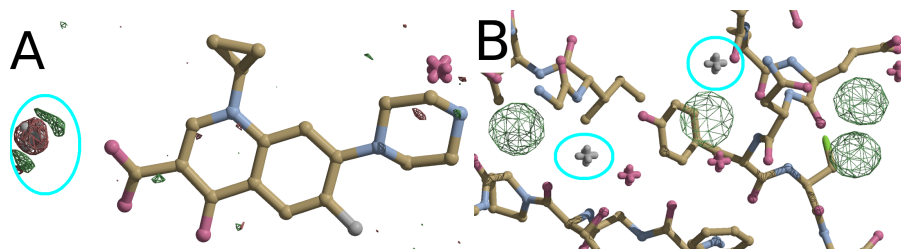

Figure S4: Random parameter perturbation with amplitude 0.6 on the structural model of data set (4) leads to destruction of the chemical integrity of the model. As discussed in the manuscript random perturbation is not necessary and not useful for bias reduction.

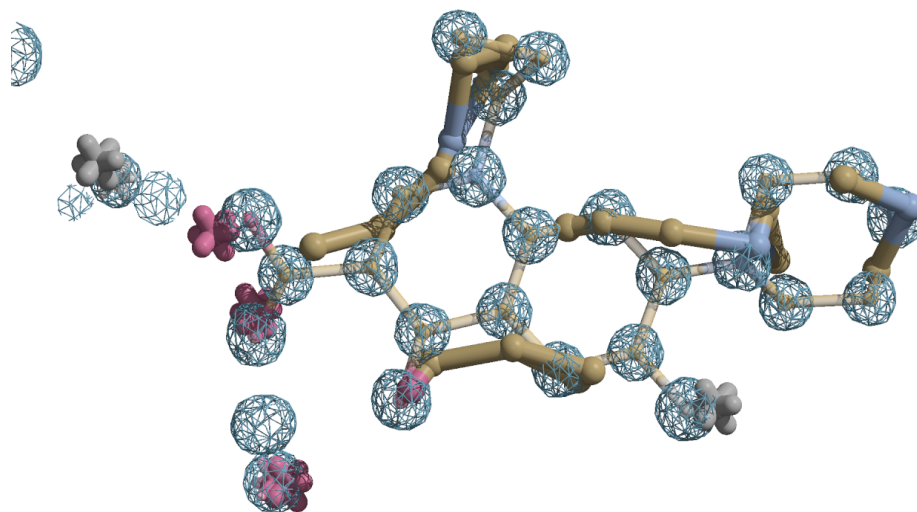

Table S12:  $R$ -values for modified structural models against calculated data.  $R1_{\text{ideal}} = R1$  after modification without refinement, *i.e.* free from overfitting.

| ID   | $ T_i $ | $R1_{\text{ideal}}$ | $R1$  | $R_{\text{complete}}$ | $\langle R_{\text{free}} \rangle$ | $\sigma(R_{\text{free}})$ |
|------|---------|---------------------|-------|-----------------------|-----------------------------------|---------------------------|
| (6') | 30      | 7.22%               | 6.50% | 7.81%                 | 7.97%                             | 1.83%                     |
| (4)  | 10      | 15.30%              | 6.13% | 6.34%                 | 6.67%                             | 2.65%                     |

Figure S5: Reduction of the effect of overfitting from the structural model by perturbing all parameters (A+C) or coordinates only (B+D).  $R1$  at  $X = 0$  corresponding to Tables S13 and S14 respectively. A+B from the non-centric data set (6), C+D from the centric data set (1).

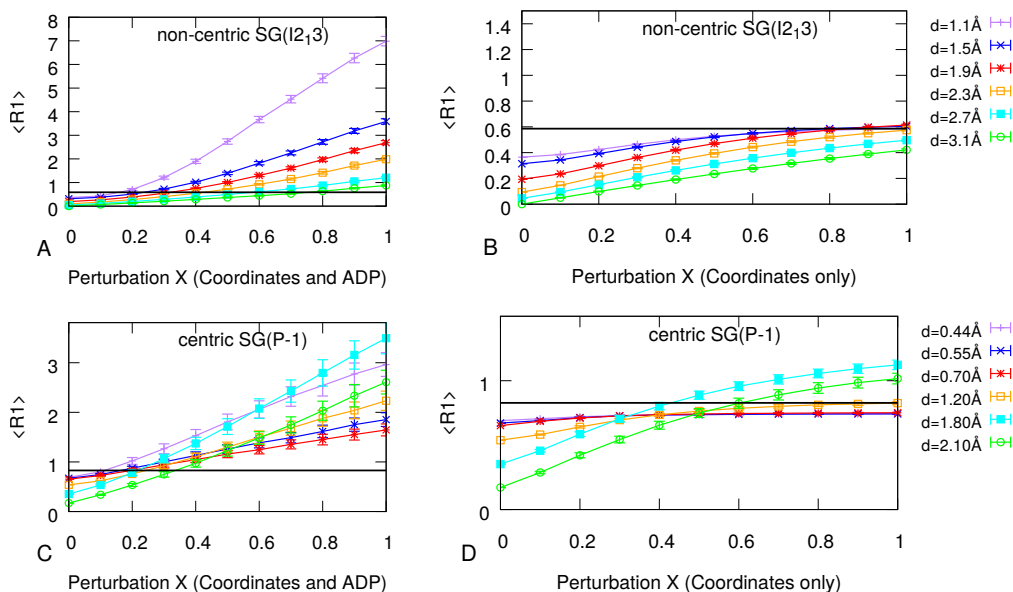

## 1.6 Effect of Parameter Perturbation

A regular grid of atoms was freely refined until convergence. Subsequently, coordinates and coordinates plus atomic displacement parameters were randomly perturbed with the commands 'WIGL -X 0' and 'WIGL -X X' respectively. The average  $R1$  was calculated 500 times without further refinement. Fig. S5 and Tables S15–S26 presented the results. The parameter X was varied from 0 to 1.0 in steps of 0.1; the calculations were carried out with data cut to a resolution between 1.1 Å and 3.1 Å for data set (6) in space group  $I2_13$  and between 0.44 Å to 2.1 Å for data set (1) in space group  $P\bar{1}$ . The phase error  $\langle\Delta\phi\rangle = \arg\sum_i^N e^{i\Delta\phi_i}$  and the mean resultant length, which corresponds to the standard deviation for circular data,  $\rho = \|1/N\sum_i^N e^{i\Delta\phi_i}\|$  were calculated against the phases from the unperturbed parameters. Only  $\langle R1 \rangle$  is displayed in the main text.

In the centrosymmetric spacegroup  $P\bar{1}$ , the phase angle can be either  $0^\circ$  or  $180^\circ$  and hence  $\langle\Delta\Phi\rangle = 0^\circ$  or  $\langle\Delta\Phi\rangle = 180^\circ$  or may even not be computable if  $\rho \approx 0$ .

### 1.6.1 Non-Centrosymmetric Space Group, Data Set (6)

Numerical values presented in Fig. S5 A+B are listed in Tables S15–S20.



Table S13:  $r$  and  $R1$  by resolution cut-off from data set (6) to assess the reduction of the effect of overfitting from the structural model by random parameter perturbation for a non-centrosymmetric space group.  $R1$ : reliability index after unrestrained refinement. See Fig. S5 C+D.

|                  |     |        |        |       |       |       |       |
|------------------|-----|--------|--------|-------|-------|-------|-------|
| $d_{\text{min}}$ | [Å] | 1.10   | 1.50   | 1.90  | 2.30  | 2.70  | 3.10  |
| #data            |     | 32,598 | 13,013 | 6,469 | 3,696 | 2,305 | 1,540 |
| #data:#param.    |     | 6.80   | 2.71   | 1.35  | 0.77  | 0.48  | 0.32  |
| R1               | [%] | 36.5   | 31.4   | 19.3  | 9.40  | 4.50  | 0.00  |

Table S14: Data to parameter ratio  $r$  and  $R1$  by resolution cut-off from data set (1) to assess the reduction of the effect of overfitting from the structural model by random parameter perturbation for a centrosymmetric space group.  $R1$ : reliability index after unrestrained refinement. See Fig. S5 A+B.

|                  |     |        |        |        |       |      |      |
|------------------|-----|--------|--------|--------|-------|------|------|
| $d_{\text{min}}$ | [Å] | 0.44   | 0.55   | 0.70   | 1.20  | 1.80 | 2.10 |
| #data            |     | 42,997 | 24,100 | 12,045 | 2,375 | 690  | 418  |
| #data:#param.    |     | 80.4   | 45.0   | 22.5   | 4.44  | 1.29 | 0.78 |
| R1               | [%] | 69.0   | 67.1   | 65.2   | 53.8  | 35.3 | 17.1 |

Table S15: Numerical Values for Fig. S5: Spacegroup  $I2_13$ , data set (6),  $d_{\text{min}} = 1.10\text{Å}$

| X   | WIGL -X X                           |                              |                        | WIGL -X 0                           |                              |                        |
|-----|-------------------------------------|------------------------------|------------------------|-------------------------------------|------------------------------|------------------------|
|     | $\langle R1 \rangle \pm \sigma(R1)$ | $\langle \Delta\Phi \rangle$ | $\langle \rho \rangle$ | $\langle R1 \rangle \pm \sigma(R1)$ | $\langle \Delta\Phi \rangle$ | $\langle \rho \rangle$ |
| 0.0 | 0.3645±0.0000                       | 0.0                          | 1.000                  | 0.3645±0.0000                       | 0.0                          | 1.000                  |
| 0.1 | 0.4287±0.0085                       | 22.9                         | 0.856                  | 0.3851±0.0013                       | 12.6                         | 0.944                  |
| 0.2 | 0.7038±0.0415                       | 41.8                         | 0.715                  | 0.4238±0.0024                       | 23.8                         | 0.860                  |
| 0.3 | 1.2062±0.0652                       | 54.8                         | 0.652                  | 0.4644±0.0035                       | 35.3                         | 0.770                  |
| 0.4 | 1.8972±0.0888                       | 64.6                         | 0.620                  | 0.4995±0.0036                       | 46.7                         | 0.696                  |
| 0.5 | 2.7363±0.1130                       | 72.1                         | 0.604                  | 0.5271±0.0039                       | 57.7                         | 0.643                  |
| 0.6 | 3.6663±0.1345                       | 77.6                         | 0.597                  | 0.5480±0.0036                       | 67.6                         | 0.611                  |
| 0.7 | 4.5307±0.1588                       | 81.5                         | 0.594                  | 0.5629±0.0042                       | 75.7                         | 0.595                  |
| 0.8 | 5.4145±0.1885                       | 84.4                         | 0.594                  | 0.5737±0.0039                       | 81.7                         | 0.589                  |
| 0.9 | 6.2709±0.1994                       | 86.3                         | 0.594                  | 0.5816±0.0036                       | 85.4                         | 0.589                  |
| 1.0 | 6.9863±0.2000                       | 87.5                         | 0.595                  | 0.5866±0.0040                       | 87.5                         | 0.591                  |

Table S16: Numerical Values for Fig. S5: Spacegroup  $I2_13$ , data set (6),  $d_{\text{min}} = 1.50\text{\AA}$

| x   | WIGL -X X                           |                              |                        | WIGL -X 0                           |                              |                        |
|-----|-------------------------------------|------------------------------|------------------------|-------------------------------------|------------------------------|------------------------|
|     | $\langle R1 \rangle \pm \sigma(R1)$ | $\langle \Delta\Phi \rangle$ | $\langle \rho \rangle$ | $\langle R1 \rangle \pm \sigma(R1)$ | $\langle \Delta\Phi \rangle$ | $\langle \rho \rangle$ |
| 0.0 | 0.3136±0.0000                       | 0.0                          | 1.000                  | 0.3136±0.0000                       | 0.0                          | 1.000                  |
| 0.1 | 0.3749±0.0038                       | 14.7                         | 0.926                  | 0.3432±0.0017                       | 9.5                          | 0.967                  |
| 0.2 | 0.5107±0.0134                       | 28.0                         | 0.810                  | 0.3920±0.0030                       | 18.2                         | 0.901                  |
| 0.3 | 0.7217±0.0283                       | 39.4                         | 0.724                  | 0.4422±0.0041                       | 26.9                         | 0.826                  |
| 0.4 | 1.0134±0.0393                       | 49.5                         | 0.667                  | 0.4861±0.0052                       | 35.4                         | 0.758                  |
| 0.5 | 1.3866±0.0527                       | 58.0                         | 0.630                  | 0.5220±0.0056                       | 43.8                         | 0.701                  |
| 0.6 | 1.8187±0.0676                       | 65.1                         | 0.608                  | 0.5499±0.0054                       | 51.9                         | 0.657                  |
| 0.7 | 2.2550±0.0817                       | 70.8                         | 0.595                  | 0.5710±0.0052                       | 59.6                         | 0.624                  |
| 0.8 | 2.7199±0.0986                       | 75.5                         | 0.587                  | 0.5865±0.0055                       | 66.9                         | 0.602                  |
| 0.9 | 3.1844±0.1048                       | 79.3                         | 0.583                  | 0.5971±0.0051                       | 72.9                         | 0.588                  |
| 1.0 | 3.5849±0.1153                       | 82.1                         | 0.582                  | 0.6044±0.0051                       | 78.1                         | 0.581                  |

Table S17: Numerical Values for Fig. S5: Spacegroup  $I2_13$ , data set (6),  $d_{\text{min}} = 1.90\text{\AA}$

| x   | WIGL -X X                           |                              |                        | WIGL -X 0                           |                              |                        |
|-----|-------------------------------------|------------------------------|------------------------|-------------------------------------|------------------------------|------------------------|
|     | $\langle R1 \rangle \pm \sigma(R1)$ | $\langle \Delta\Phi \rangle$ | $\langle \rho \rangle$ | $\langle R1 \rangle \pm \sigma(R1)$ | $\langle \Delta\Phi \rangle$ | $\langle \rho \rangle$ |
| 0.0 | 0.1929±0.0000                       | 0.0                          | 1.000                  | 0.1929±0.0000                       | 0.0                          | 1.000                  |
| 0.1 | 0.2652±0.0023                       | 10.9                         | 0.948                  | 0.2348±0.0015                       | 7.5                          | 0.972                  |
| 0.2 | 0.3851±0.0072                       | 21.1                         | 0.862                  | 0.2979±0.0031                       | 14.5                         | 0.922                  |
| 0.3 | 0.5438±0.0160                       | 30.7                         | 0.781                  | 0.3616±0.0044                       | 21.2                         | 0.865                  |
| 0.4 | 0.7477±0.0258                       | 39.8                         | 0.714                  | 0.4195±0.0050                       | 27.9                         | 0.807                  |
| 0.5 | 1.0013±0.0372                       | 48.0                         | 0.664                  | 0.4700±0.0058                       | 34.6                         | 0.754                  |
| 0.6 | 1.2993±0.0486                       | 55.3                         | 0.630                  | 0.5122±0.0061                       | 41.2                         | 0.707                  |
| 0.7 | 1.6117±0.0571                       | 61.3                         | 0.608                  | 0.5471±0.0062                       | 47.9                         | 0.667                  |
| 0.8 | 1.9713±0.0716                       | 66.9                         | 0.593                  | 0.5753±0.0061                       | 54.4                         | 0.634                  |
| 0.9 | 2.3481±0.0823                       | 71.5                         | 0.583                  | 0.5969±0.0065                       | 60.6                         | 0.610                  |
| 1.0 | 2.6878±0.0861                       | 75.3                         | 0.577                  | 0.6138±0.0061                       | 66.2                         | 0.593                  |

Table S18: Numerical Values for Fig. S5: Spacegroup  $I2_13$ , data set (6),  $d_{\text{min}} = 2.30\text{\AA}$

| x   | WIGL -X X                           |                              |                        | WIGL -X 0                           |                              |                        |
|-----|-------------------------------------|------------------------------|------------------------|-------------------------------------|------------------------------|------------------------|
|     | $\langle R1 \rangle \pm \sigma(R1)$ | $\langle \Delta\Phi \rangle$ | $\langle \rho \rangle$ | $\langle R1 \rangle \pm \sigma(R1)$ | $\langle \Delta\Phi \rangle$ | $\langle \rho \rangle$ |
| 0.0 | 0.0936±0.0000                       | 0.0                          | 1.000                  | 0.0936±0.0000                       | 0.0                          | 1.000                  |
| 0.1 | 0.1735±0.0021                       | 8.3                          | 0.965                  | 0.1461±0.0015                       | 5.9                          | 0.979                  |
| 0.2 | 0.2790±0.0052                       | 16.1                         | 0.902                  | 0.2138±0.0028                       | 11.5                         | 0.941                  |
| 0.3 | 0.4022±0.0105                       | 23.8                         | 0.832                  | 0.2792±0.0040                       | 17.0                         | 0.896                  |
| 0.4 | 0.5455±0.0163                       | 31.2                         | 0.769                  | 0.3401±0.0052                       | 22.4                         | 0.847                  |
| 0.5 | 0.7185±0.0255                       | 38.4                         | 0.714                  | 0.3941±0.0058                       | 27.8                         | 0.799                  |
| 0.6 | 0.9247±0.0332                       | 45.1                         | 0.671                  | 0.4428±0.0066                       | 33.3                         | 0.753                  |
| 0.7 | 1.1475±0.0441                       | 51.2                         | 0.639                  | 0.4848±0.0070                       | 38.8                         | 0.712                  |
| 0.8 | 1.4160±0.0558                       | 57.2                         | 0.613                  | 0.5201±0.0079                       | 44.3                         | 0.677                  |
| 0.9 | 1.7176±0.0663                       | 62.2                         | 0.597                  | 0.5505±0.0072                       | 49.8                         | 0.645                  |
| 1.0 | 1.9873±0.0674                       | 66.5                         | 0.584                  | 0.5748±0.0074                       | 55.2                         | 0.619                  |

Table S19: Numerical Values for Fig. S5: Spacegroup  $I2_13$ , data set (6),  $d_{\text{min}} = 2.70\text{\AA}$

| x   | WIGL -X X                           |                              |                        | WIGL -X 0                           |                              |                        |
|-----|-------------------------------------|------------------------------|------------------------|-------------------------------------|------------------------------|------------------------|
|     | $\langle R1 \rangle \pm \sigma(R1)$ | $\langle \Delta\Phi \rangle$ | $\langle \rho \rangle$ | $\langle R1 \rangle \pm \sigma(R1)$ | $\langle \Delta\Phi \rangle$ | $\langle \rho \rangle$ |
| 0.0 | 0.0454±0.0000                       | 0.0                          | 1.000                  | 0.0454±0.0000                       | 0.0                          | 1.000                  |
| 0.1 | 0.1142±0.0017                       | 6.0                          | 0.976                  | 0.0939±0.0013                       | 4.4                          | 0.985                  |
| 0.2 | 0.1974±0.0040                       | 11.8                         | 0.933                  | 0.1517±0.0028                       | 8.7                          | 0.959                  |
| 0.3 | 0.2880±0.0072                       | 17.7                         | 0.881                  | 0.2087±0.0038                       | 12.9                         | 0.925                  |
| 0.4 | 0.3854±0.0108                       | 23.5                         | 0.826                  | 0.2618±0.0051                       | 17.0                         | 0.888                  |
| 0.5 | 0.4919±0.0151                       | 29.3                         | 0.775                  | 0.3119±0.0059                       | 21.3                         | 0.848                  |
| 0.6 | 0.6062±0.0198                       | 35.0                         | 0.729                  | 0.3569±0.0067                       | 25.5                         | 0.809                  |
| 0.7 | 0.7284±0.0258                       | 40.5                         | 0.688                  | 0.3987±0.0068                       | 30.0                         | 0.770                  |
| 0.8 | 0.8755±0.0315                       | 46.2                         | 0.654                  | 0.4355±0.0080                       | 34.4                         | 0.734                  |
| 0.9 | 1.0488±0.0397                       | 51.6                         | 0.626                  | 0.4682±0.0079                       | 39.1                         | 0.700                  |
| 1.0 | 1.2062±0.0425                       | 56.4                         | 0.605                  | 0.4966±0.0084                       | 43.8                         | 0.668                  |

Table S20: Numerical Values for Fig. S5: Spacegroup  $I2_13$ , data set (6),  $d_{\text{min}} = 3.10\text{\AA}$

| x   | WIGL -X X                           |                              |                        | WIGL -X 0                           |                              |                        |
|-----|-------------------------------------|------------------------------|------------------------|-------------------------------------|------------------------------|------------------------|
|     | $\langle R1 \rangle \pm \sigma(R1)$ | $\langle \Delta\Phi \rangle$ | $\langle \rho \rangle$ | $\langle R1 \rangle \pm \sigma(R1)$ | $\langle \Delta\Phi \rangle$ | $\langle \rho \rangle$ |
| 0.0 | 0.0002±0.0000                       | 0.0                          | 1.000                  | 0.0002±0.0000                       | 0.0                          | 1.000                  |
| 0.1 | 0.0677±0.0022                       | 4.57                         | 0.984                  | 0.0496±0.0022                       | 3.3                          | 0.991                  |
| 0.2 | 0.1364±0.0037                       | 9.03                         | 0.953                  | 0.0983±0.0028                       | 6.6                          | 0.971                  |
| 0.3 | 0.2089±0.0060                       | 13.6                         | 0.913                  | 0.1451±0.0038                       | 9.7                          | 0.948                  |
| 0.4 | 0.2853±0.0095                       | 18.2                         | 0.869                  | 0.1910±0.0047                       | 12.9                         | 0.920                  |
| 0.5 | 0.3643±0.0124                       | 22.9                         | 0.825                  | 0.2346±0.0052                       | 16.2                         | 0.890                  |
| 0.6 | 0.4420±0.0148                       | 27.7                         | 0.780                  | 0.2767±0.0065                       | 19.5                         | 0.858                  |
| 0.7 | 0.5256±0.0181                       | 32.3                         | 0.740                  | 0.3159±0.0071                       | 22.9                         | 0.826                  |
| 0.8 | 0.6330±0.0243                       | 37.7                         | 0.699                  | 0.3537±0.0075                       | 26.5                         | 0.792                  |
| 0.9 | 0.7609±0.0300                       | 42.8                         | 0.665                  | 0.3886±0.0084                       | 30.2                         | 0.760                  |
| 1.0 | 0.8743±0.0311                       | 47.3                         | 0.638                  | 0.4214±0.0081                       | 34.2                         | 0.727                  |

Table S21: Numerical Values for Fig. S5: Spacegroup  $P\bar{1}$ , data set (1),  $d_{min} = 0.44\text{\AA}$

| x   | WIGL -X X                           |                              |                        | WIGL -X 0                           |                              |                        |
|-----|-------------------------------------|------------------------------|------------------------|-------------------------------------|------------------------------|------------------------|
|     | $\langle R1 \rangle \pm \sigma(R1)$ | $\langle \Delta\Phi \rangle$ | $\langle \rho \rangle$ | $\langle R1 \rangle \pm \sigma(R1)$ | $\langle \Delta\Phi \rangle$ | $\langle \rho \rangle$ |
| 0.0 | 0.6903±0.0000                       | 0.0                          | 1.000                  | 0.6903±0.0000                       | 0                            | 1.000                  |
| 0.1 | 0.8001±0.0267                       | 0.0                          | 0.517                  | 0.7046±0.0016                       | 0                            | 0.664                  |
| 0.2 | 1.0202±0.0684                       | 0.0                          | 0.229                  | 0.7204±0.0023                       | 0                            | 0.340                  |
| 0.3 | 1.2645±0.0997                       | 0.0                          | 0.085                  | 0.7294±0.0022                       | 0                            | 0.120                  |
| 0.4 | 1.5283±0.1254                       | 0.0                          | 0.030                  | 0.7343±0.0022                       | 0                            | 0.048                  |
| 0.5 | 1.8062±0.1583                       | 0.0                          | 0.019                  | 0.7370±0.0021                       | 0                            | 0.040                  |
| 0.6 | 2.0584±0.1735                       | 0.0                          | 0.015                  | 0.7389±0.0021                       | 0                            | 0.036                  |
| 0.7 | 2.3186±0.1963                       | 0.0                          | 0.011                  | 0.7403±0.0021                       | 0                            | 0.031                  |
| 0.8 | 2.5402±0.2113                       | 0.0                          | 0.009                  | 0.7411±0.0022                       | 0                            | 0.025                  |
| 0.9 | 2.7719±0.2219                       | 0.0                          | 0.007                  | 0.7419±0.0022                       | 0                            | 0.023                  |
| 1.0 | 2.9631±0.2387                       | 0.0                          | 0.006                  | 0.7425±0.0021                       | 180                          | 0.021                  |

Table S22: Numerical Values for Fig. S5: Spacegroup  $P\bar{1}$ , data set (1),  $d_{min} = 0.55\text{\AA}$

| x   | WIGL -X X                           |                              |                        | WIGL -X 0                           |                              |                        |
|-----|-------------------------------------|------------------------------|------------------------|-------------------------------------|------------------------------|------------------------|
|     | $\langle R1 \rangle \pm \sigma(R1)$ | $\langle \Delta\Phi \rangle$ | $\langle \rho \rangle$ | $\langle R1 \rangle \pm \sigma(R1)$ | $\langle \Delta\Phi \rangle$ | $\langle \rho \rangle$ |
| 0.0 | 0.6712±0.0000                       | 0                            | 1.000                  | 0.6712±0.0000                       | 0                            | 1.000                  |
| 0.1 | 0.7456±0.0186                       | 0                            | 0.556                  | 0.6902±0.0022                       | 0                            | 0.716                  |
| 0.2 | 0.8746±0.0382                       | 0                            | 0.300                  | 0.7132±0.0035                       | 0                            | 0.436                  |
| 0.3 | 0.9998±0.0555                       | 0                            | 0.144                  | 0.7271±0.0031                       | 0                            | 0.213                  |
| 0.4 | 1.1305±0.0719                       | 0                            | 0.061                  | 0.7336±0.0027                       | 0                            | 0.079                  |
| 0.5 | 1.2607±0.0858                       | -                            | 0.027                  | 0.7367±0.0027                       | -                            | 0.039                  |
| 0.6 | 1.3847±0.1004                       | 0                            | 0.017                  | 0.7390±0.0027                       | 0                            | 0.028                  |
| 0.7 | 1.4897±0.1050                       | -                            | 0.013                  | 0.7405±0.0025                       | -                            | 0.023                  |
| 0.8 | 1.6146±0.1263                       | -                            | 0.010                  | 0.7414±0.0027                       | -                            | 0.021                  |
| 0.9 | 1.7513±0.1335                       | -                            | 0.009                  | 0.7420±0.0027                       | 0                            | 0.018                  |
| 1.0 | 1.8528±0.1386                       | 0                            | 0.008                  | 0.7426±0.0026                       | 0                            | 0.016                  |

### 1.6.2 Centrosymmetric Space Group, Data Set (1)

Numerical values presented in Fig. S5 C+D are listed in Tables S21–S26.

### 1.7 Influence of Parameter Perturbation on Convergence Rate

Numerical Values for Fig. S6, calculated with data set (1), cut to 1.9 Å resolution are listed in Table S27.

## 2 Crystallization and Data Collection for Data Sets (8) and (6)

### 2.1 Elastase Data Set (8)

The elastase data set (8) has been used widely for various tutorials on phasing. The data set can be downloaded from <http://shelx.uni-ac.gwdg.de/~tg/teaching/anl-ccp4> as part of the tutorial data for

Table S23: Numerical Values for Fig. S5: Spacegroup  $P\bar{1}$ , data set (1),  $d_{\text{min}} = 0.70\text{\AA}$

| x   | WIGL -X X                           |                              |                        | WIGL -X 0                           |                              |                        |
|-----|-------------------------------------|------------------------------|------------------------|-------------------------------------|------------------------------|------------------------|
|     | $\langle R1 \rangle \pm \sigma(R1)$ | $\langle \Delta\Phi \rangle$ | $\langle \rho \rangle$ | $\langle R1 \rangle \pm \sigma(R1)$ | $\langle \Delta\Phi \rangle$ | $\langle \rho \rangle$ |
| 0.0 | 0.6516±0.0000                       | 0                            | 1.000                  | 0.6516±0.0000                       | 0                            | 1.000                  |
| 0.1 | 0.7265±0.0141                       | 0                            | 0.634                  | 0.6848±0.0020                       | 0                            | 0.786                  |
| 0.2 | 0.8324±0.0320                       | 0                            | 0.398                  | 0.7103±0.0035                       | 0                            | 0.552                  |
| 0.3 | 0.9422±0.0475                       | 0                            | 0.236                  | 0.7273±0.0038                       | 0                            | 0.342                  |
| 0.4 | 1.0466±0.0614                       | 0                            | 0.126                  | 0.7365±0.0036                       | 0                            | 0.186                  |
| 0.5 | 1.1584±0.0727                       | 0                            | 0.063                  | 0.7418±0.0035                       | 0                            | 0.083                  |
| 0.6 | 1.2465±0.0846                       | 0                            | 0.035                  | 0.7452±0.0036                       | 0                            | 0.043                  |
| 0.7 | 1.3539±0.0912                       | 0                            | 0.020                  | 0.7474±0.0037                       | 0                            | 0.029                  |
| 0.8 | 1.4507±0.1076                       | 0                            | 0.016                  | 0.7492±0.0036                       | 0                            | 0.025                  |
| 0.9 | 1.5515±0.1096                       | 0                            | 0.014                  | 0.7505±0.0038                       | 0                            | 0.023                  |
| 1.0 | 1.6449±0.1201                       | 0                            | 0.011                  | 0.7515±0.0036                       | 0                            | 0.020                  |

Table S24: Numerical Values for Fig. S5: Spacegroup  $P\bar{1}$ , data set (1),  $d_{\text{min}} = 1.20\text{\AA}$

| x   | WIGL -X X                           |                              |                        | WIGL -X 0                           |                              |                        |
|-----|-------------------------------------|------------------------------|------------------------|-------------------------------------|------------------------------|------------------------|
|     | $\langle R1 \rangle \pm \sigma(R1)$ | $\langle \Delta\Phi \rangle$ | $\langle \rho \rangle$ | $\langle R1 \rangle \pm \sigma(R1)$ | $\langle \Delta\Phi \rangle$ | $\langle \rho \rangle$ |
| 0.0 | 0.5383±0.0000                       | 0                            | 1.000                  | 0.5383±0.0000                       | 0                            | 1.000                  |
| 0.1 | 0.6193±0.0105                       | 0                            | 0.801                  | 0.5818±0.0045                       | 0                            | 0.888                  |
| 0.2 | 0.7577±0.0339                       | 0                            | 0.596                  | 0.6415±0.0088                       | 0                            | 0.737                  |
| 0.3 | 0.9222±0.0565                       | 0                            | 0.435                  | 0.6946±0.0105                       | 0                            | 0.584                  |
| 0.4 | 1.1017±0.0782                       | 0                            | 0.312                  | 0.7357±0.0117                       | 0                            | 0.449                  |
| 0.5 | 1.2972±0.1018                       | 0                            | 0.216                  | 0.7646±0.0125                       | 0                            | 0.329                  |
| 0.6 | 1.4977±0.1265                       | 0                            | 0.148                  | 0.7858±0.0122                       | 0                            | 0.228                  |
| 0.7 | 1.6814±0.1425                       | 0                            | 0.097                  | 0.8006±0.0128                       | 0                            | 0.151                  |
| 0.8 | 1.8791±0.1604                       | 0                            | 0.061                  | 0.8128±0.0123                       | 0                            | 0.087                  |
| 0.9 | 2.0388±0.1694                       | 0                            | 0.040                  | 0.8201±0.0130                       | 0                            | 0.053                  |
| 1.0 | 2.2330±0.1940                       | 0                            | 0.028                  | 0.8260±0.0123                       | 0                            | 0.038                  |

Table S25: Numerical Values for Fig. S5: Spacegroup  $P\bar{1}$ , data set (1),  $d_{\text{min}} = 1.80\text{\AA}$

| x   | WIGL -X X                           |                              |                        | WIGL -X 0                           |                              |                        |
|-----|-------------------------------------|------------------------------|------------------------|-------------------------------------|------------------------------|------------------------|
|     | $\langle R1 \rangle \pm \sigma(R1)$ | $\langle \Delta\Phi \rangle$ | $\langle \rho \rangle$ | $\langle R1 \rangle \pm \sigma(R1)$ | $\langle \Delta\Phi \rangle$ | $\langle \rho \rangle$ |
| 0.0 | 0.3527±0.0000                       | 0                            | 1.000                  | 0.3527±0.0000                       | 0                            | 1.000                  |
| 0.1 | 0.5344±0.0204                       | 0                            | 0.814                  | 0.4567±0.0096                       | 0                            | 0.885                  |
| 0.2 | 0.7792±0.0528                       | 0                            | 0.623                  | 0.5850±0.0184                       | 0                            | 0.754                  |
| 0.3 | 1.0674±0.0867                       | 0                            | 0.479                  | 0.7038±0.0245                       | 0                            | 0.632                  |
| 0.4 | 1.3727±0.1238                       | 0                            | 0.370                  | 0.8026±0.0292                       | 0                            | 0.524                  |
| 0.5 | 1.7122±0.1581                       | 0                            | 0.284                  | 0.8877±0.0321                       | 0                            | 0.425                  |
| 0.6 | 2.0751±0.1967                       | 0                            | 0.221                  | 0.9574±0.0341                       | 0                            | 0.339                  |
| 0.7 | 2.4284±0.2242                       | 0                            | 0.168                  | 1.0102±0.0362                       | 0                            | 0.273                  |
| 0.8 | 2.7939±0.2658                       | -                            | 0.127                  | 1.0560±0.0338                       | 0                            | 0.212                  |
| 0.9 | 3.1555±0.2851                       | 0                            | 0.094                  | 1.0934±0.0360                       | 0                            | 0.156                  |
| 1.0 | 3.4939±0.3141                       | -                            | 0.075                  | 1.1228±0.0367                       | -                            | 0.117                  |

Table S26: Numerical Values for Fig. S5: Spacegroup  $P\bar{1}$ , data set (1),  $d_{\text{min}} = 2.10\text{\AA}$

| X   | WIGL -X X                           |                              |                        | WIGL -X 0                           |                              |                        |
|-----|-------------------------------------|------------------------------|------------------------|-------------------------------------|------------------------------|------------------------|
|     | $\langle R1 \rangle \pm \sigma(R1)$ | $\langle \Delta\Phi \rangle$ | $\langle \rho \rangle$ | $\langle R1 \rangle \pm \sigma(R1)$ | $\langle \Delta\Phi \rangle$ | $\langle \rho \rangle$ |
| 0.0 | 0.1709±0.0000                       | 0                            | 1.000                  | 0.1709±0.0000                       | 0                            | 1.000                  |
| 0.1 | 0.3382±0.0125                       | 0                            | 0.858                  | 0.2874±0.0096                       | 0                            | 0.901                  |
| 0.2 | 0.5351±0.0304                       | 0                            | 0.713                  | 0.4214±0.0190                       | 0                            | 0.793                  |
| 0.3 | 0.7483±0.0554                       | 0                            | 0.577                  | 0.5432±0.0258                       | 0                            | 0.693                  |
| 0.4 | 0.9730±0.0779                       | 0                            | 0.465                  | 0.6543±0.0308                       | 0                            | 0.598                  |
| 0.5 | 1.2285±0.1116                       | 0                            | 0.370                  | 0.7486±0.0346                       | 0                            | 0.512                  |
| 0.6 | 1.4831±0.1257                       | 0                            | 0.294                  | 0.8252±0.0388                       | 0                            | 0.433                  |
| 0.7 | 1.7456±0.1630                       | 0                            | 0.232                  | 0.8900±0.0399                       | 0                            | 0.359                  |
| 0.8 | 2.0325±0.1919                       | 0                            | 0.186                  | 0.9431±0.0413                       | 0                            | 0.294                  |
| 0.9 | 2.3351±0.2258                       | -                            | 0.144                  | 0.9851±0.0417                       | 0                            | 0.239                  |
| 1.0 | 2.6083±0.2385                       | -                            | 0.114                  | 1.0163±0.0413                       | 0                            | 0.193                  |

Figure S6:  $R_{\text{complete}}$  vs. number of refinement cycles at various amplitudes of perturbation amplitude converge to the same value, the real  $R_{\text{complete}}$ . Tested with data set (6'). The number of refinement cycles actually performed is shown by tics along the abscissa.

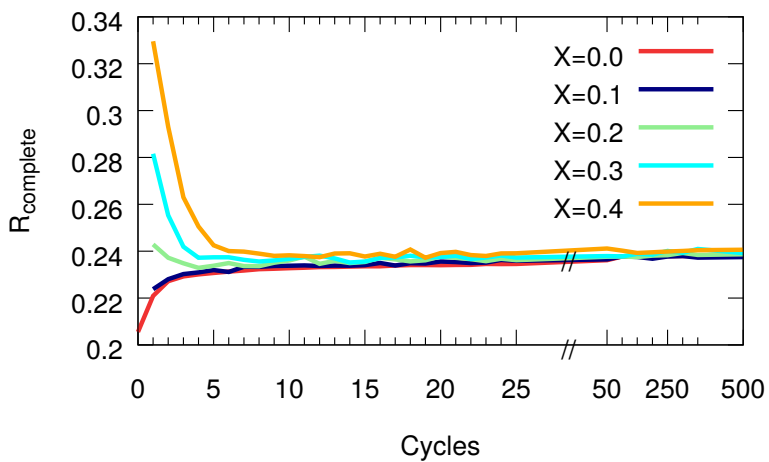

Table S27: Numerical Values for Fig. S6: Value of  $R_{\text{complete}}$  vs. number of refinement cycles depending on the perturbation amplitude X. 4,000 and 10,000 cycles were only calculated for  $X = 0.0$  and  $X = 0.3$  to prove convergence within statistical or numerical precision.

| #      | Perturbation Amplitude X |          |          |          |          |
|--------|--------------------------|----------|----------|----------|----------|
|        | 0.0                      | 0.1      | 0.2      | 0.3      | 0.4      |
| 0      | 0.205555                 |          |          |          |          |
| 1      | 0.220894                 | 0.223783 | 0.242903 | 0.281555 | 0.329551 |
| 2      | 0.227219                 | 0.228039 | 0.237218 | 0.255288 | 0.293071 |
| 3      | 0.229256                 | 0.230216 | 0.234834 | 0.241878 | 0.262984 |
| 4      | 0.230084                 | 0.230963 | 0.232871 | 0.237202 | 0.250519 |
| 5      | 0.230714                 | 0.231944 | 0.233809 | 0.237414 | 0.242529 |
| 6      | 0.231276                 | 0.231155 | 0.234932 | 0.237394 | 0.240037 |
| 7      | 0.231768                 | 0.233354 | 0.233657 | 0.236302 | 0.239823 |
| 8      | 0.232334                 | 0.23334  | 0.233584 | 0.235603 | 0.238969 |
| 9      | 0.23249                  | 0.233718 | 0.235089 | 0.236057 | 0.23801  |
| 10     | 0.232753                 | 0.233813 | 0.236041 | 0.236719 | 0.238237 |
| 11     | 0.232942                 | 0.233918 | 0.237673 | 0.237529 | 0.237896 |
| 12     | 0.233214                 | 0.233695 | 0.23461  | 0.238121 | 0.23742  |
| 13     | 0.233275                 | 0.233853 | 0.235896 | 0.236941 | 0.239012 |
| 14     | 0.233425                 | 0.233811 | 0.23493  | 0.235174 | 0.239078 |
| 15     | 0.233548                 | 0.234037 | 0.23539  | 0.235585 | 0.237742 |
| 16     | 0.233576                 | 0.234985 | 0.237207 | 0.237118 | 0.238928 |
| 17     | 0.23388                  | 0.233906 | 0.236475 | 0.237314 | 0.237628 |
| 18     | 0.234073                 | 0.234874 | 0.235656 | 0.23804  | 0.240712 |
| 19     | 0.234065                 | 0.234717 | 0.236112 | 0.23734  | 0.237193 |
| 20     | 0.234005                 | 0.235592 | 0.237739 | 0.237524 | 0.239199 |
| 21     | 0.234106                 | 0.235376 | 0.23717  | 0.238034 | 0.239732 |
| 22     | 0.234186                 | 0.234913 | 0.236598 | 0.236663 | 0.238334 |
| 23     | 0.234535                 | 0.23511  | 0.235754 | 0.237303 | 0.237951 |
| 24     | 0.234522                 | 0.236237 | 0.23678  | 0.238147 | 0.239057 |
| 25     | 0.234571                 | 0.235888 | 0.236152 | 0.237297 | 0.239077 |
| 50     | 0.236163                 | 0.236475 | 0.237622 | 0.237922 | 0.241152 |
| 100    | 0.237724                 | 0.23776  | 0.237708 | 0.237754 | 0.240228 |
| 150    | 0.237774                 | 0.23753  | 0.237493 | 0.238846 | 0.239245 |
| 200    | 0.237673                 | 0.236798 | 0.238123 | 0.238546 | 0.239541 |
| 250    | 0.237882                 | 0.237746 | 0.238299 | 0.240072 | 0.239877 |
| 300    | 0.237911                 | 0.23792  | 0.239234 | 0.239266 | 0.240103 |
| 350    | 0.238038                 | 0.23725  | 0.238411 | 0.24094  | 0.240429 |
| 500    | 0.238062                 | 0.237508 | 0.238673 | 0.239202 | 0.240602 |
| 4,000  | 0.238284                 | -        | -        | 0.239047 | -        |
| 10,000 | 0.238147                 | -        | -        | 0.238533 | -        |

Table S28: Data statistics for data set (8).

|                          |                                                                                                         |
|--------------------------|---------------------------------------------------------------------------------------------------------|
| Space group              | $P2_12_12_1$                                                                                            |
| Cell                     | $a=49.704\text{\AA}$ , $b=57.895\text{\AA}$ , $c=74.169\text{\AA}$ , $\alpha = \beta = \gamma 90^\circ$ |
| Resolution (outer shell) | $37.71\text{\AA}$ – $1.37\text{\AA}$ ( $1.47\text{\AA}$ – $1.37\text{\AA}$ )                            |
| # refl.                  | 44784 (7662)                                                                                            |
| Completeness             | 97.4% (87.2%)                                                                                           |
| $I/\sigma(I)$            | 45.16 (7.87)                                                                                            |

Table S29: Data statistics for insulin data set (6). Cell:  $a = b = c = 77.701\text{\AA}$ ,  $\alpha = \beta = \gamma = 90^\circ$   
Numbers in brackets refer to highest resolution shell.

| SG      | Cell               | Dist. [mm] | $\Delta\phi$ | $\phi_{\text{total}}$ | Resol. [ $\text{\AA}$ ]     | # refl.           | multipl.         | $R_{\text{meas}}$ | $\langle I/\sigma(I) \rangle$ | CC(1/2)        |
|---------|--------------------|------------|--------------|-----------------------|-----------------------------|-------------------|------------------|-------------------|-------------------------------|----------------|
| $I2_13$ | $77.701\text{\AA}$ | 170.28     | $0.1^\circ$  | $180^\circ$           | 32.13–1.10<br>(1.13 – 1.10) | 32,977<br>(2,405) | 19.81<br>(19.46) | 4.00%<br>(170.1%) | 26.2<br>(1.73)                | 1.00<br>(0.62) |

the CCP4 Workshop Chicago.

Porcine Elastase was purchased from Boehringer Mannheim. The powder was dissolved in 20mM HEPES pH 8.0 and 50–400 $\mu$ l  $Na_2SO_4$  to a nominal protein concentration of 40 mg/ml. Crystals were grown by the hanging drop vapor diffusion. The data were collected with an inhouse *Cu* rotating anode.

Data statistics shown in Table S28. Data only available as merged data, hence scaling and merging statistics are not available.

## 2.2 Insulin Data Set (6)

Lyophilized insulin from bovine pancreas was ordered from Sigma–Aldrich. The protein powder was dissolved in 20mM  $Na_2PO_4$  pH=10.0, 10mM  $Na_3EDTA$  to a nominal concentration of 20g/l. Crystals were grown with the sitting drop vapor diffusion method with 2 $\mu$ l protein solution and 2 $\mu$ l buffer reservoir. The buffer reservoir contained 275mM  $Na_2PO_4$  pH=10.0 and 10mM  $Na_3EDTA$ . Crystals grew within two days. For macro–seeding a selected crystal was transferred into a freshly prepared drop of identical conditions. The final crystal dimensions were  $0.23 \times 0.45 \times 0.45\text{mm}^3$ . For cryo protection the crystal was transferred into the buffer reservoir solution containing 20 % glycerol for three minutes and flash–cooled in liquid nitrogen. Data were collected at BESSY beamline MX 14.1 with a Pilatus 6M detector from Dectris at wavelength  $\lambda = 0.826568\text{\AA}$ . Data were processed with XDS [8]. Details shown in Table S29.



### 3 Scripts

#### 3.1 Regular Grid into Asymmetric Unit

The following script fills the asymmetric unit of a crystal in space group  $I2_13$  with identical atoms suitable for a `shelxl` ins-file. The positions are equally spaced with respect to fractional coordinates, not with respect to Euclidean distance.

```
ACNT=9
RESI=1

printf "%4s%5d%6s\n" "RESI" ${RESI} "UNK"
for x in $(seq 0 99); do
  xc=$(echo "scale=5; 0.5*$x/100" | bc)
  for y in $(seq 0 99); do
    yc=$(echo "scale=5; 0.5*$y/100" | bc)
    for z in $(seq 0 99); do
      if [[ $z -gt $x || $z -gt $y ]]; then
        continue;
      fi
      zc=$(echo "scale=5; 0.5*$z/100." | bc)
      if [ $ACNT -gt 99 ]; then
        RESI=$((RESI+1))
        ACNT=0
        printf "%4s%5d%6s\n" "RESI" ${RESI} "UNK"
      fi
      ACNT=$((ACNT+1))
      echo "C$ACNT 2  $xc $yc $zc 1.00 0.2"
    done
  done
done
```

The next script was used for the centrosymmetric case of data set (1):

```
#!/bin/bash
# Script to fill a P-1 asymmetric unit with (roughly)
# equal distance atoms
# acnt: atom counter; resi: residue counter

ACNT=9
RESI=1

#P-1 : 0 <=x <= 0.5, 0 <=y <=1; 0 <= z < 1
# Heli data set: C104 P4 S4 H76
# 56 atoms for parameters in unit cell
NUMX=3
NUMY=4
NUMZ=5

printf "%4s%5d%6s\n" "RESI" ${RESI} "UNK"
for x in $(seq 1 $NUMX); do
  xc=$(echo "scale=5; 0.5*$x/$NUMX" | bc)
  for y in $(seq 1 $NUMY); do
    yc=$(echo "scale=5; 1.0*$y/$NUMY" | bc)
    for z in $(seq 1 $NUMZ); do
      zc=$(echo "scale=5; 0.5*$z/$NUMZ" | bc)
      if [ $ACNT -gt 99 ]; then

```

```

        RESI=$((RESI+1))
        ACNT=0
        printf "%4s%5d%6s\n" "RESI" ${RESI} "UNK"
    fi
    ACNT=$((ACNT+1))
    printf "C%03d 1 %6.4f %6.4f %6.4f 11.00 0.2\n" \
        $ACNT $xc $yc $zc
done
done
done
done

```

### 3.2 R<sub>complete</sub> based Electron Density Maps

The program Coot [2] reads an fcf-file from SHELXL produced with the LIST 6 command. As of version 2014/8, SHELXL provides the LIST 9 command that writes data required for map calculation only for the free set of reflections. LIST 6 contains the data items  $hklF_o^2\sigma(F_o^2)F_c\phi_c$  per line. LIST 9 writes the data items  $hklF_o^2\sigma(F_o^2)F_c^2\phi_c d$  and the header ends with the term “\_shelx\_refinement\_sigma”. The conversion from the former to the latter is achieved with the following script:

```

Fmax=$(grep -m1 _shelx_F_calc_maximum kcross_set*fcf | \
    sort -g -k2 | tail -n1 | awk '{print $2}')

echo "Fcalc and Fobx will be scaled to Fmax = $Fmax"
Fcmax=$(printf "_shelx_F_calc_maximum%12.2f\n" ${Fmax})

rm -f freemap.fcf
# Create header for fcf file
echo "#" > freemap.fcf
echo "# freemap.fcf created from Rcomplete calculation with LIST 9" >>freemap.fcf
echo "#" >> freemap.fcf
sed -n "1,/^_refln_F_squared_sigma/p" kcross_set0000.fcf >> freemap.fcf
sed -i "s/^_shelx_refln_list_code      9/_shelx_refln_list_code      6/" freemap.fcf
sed -i "s/^_shelx_F_calc_maximum.*$/${Fcmax}/" freemap.fcf
echo "_refln_F_calc" >> freemap.fcf
echo "_refln_phase_calc" >> freemap.fcf

for i in kcross_set*.fcf; do
    F=$(grep -m1 _shelx_F_calc_maximum $i | awk '{print $2}')
    s=$(echo "scale=8; $Fmax / $F" | bc)
    sed "1,/^_shelx_refinement_sigma/d" $i | \
        awk -v S=$s '{print $1, $2, $3, $4, $5, S*sqrt($6), $7}' >> freemap.fcf
done

```

### 3.3 Data Statistics from Overfitted Data

The following script was used to run shelxl 500 times in order to calculate the data for Tables S15–S26:

```

#!/bin/bash

NUMRUNS=500
INFILE=$1

rm -f ${INFILE}.phidata

```

```

rm -f ${INSFILE}.rldata
touch ${INSFILE}.phidata

for i in $(seq 1 ${NUMRUNS}); do
  shelxl ${INSFILE} && grep -m1 "^ R1 =" ${INSFILE}.lst \
  >> ${INSFILE}.rldata
  sed '1,/_shelx_refinement_sigma/d' ${INSFILE}.fcf | \
  awk '{ print $7}' > temp.phidata
  paste temp.phidata ${INSFILE}.phidata > temp2.phidata
  mv temp2.phidata ${INSFILE}.phidata
done

rm temp.phidata

```

Average *R1* and standard deviation were calculated from the resulting file with the suffix “*rldata*” with the script

```

#!/bin/bash

INSFILE=$1

if [ ! -f "${INSFILE}.rldata" ]
then
  echo "File ${INSFILE}.rldata does not exist"
  exit
fi

cut -c47-52 ${INSFILE}.rldata > myr1.data
/bin/echo -n "$INSFILE: "
octave --no-window-system -q << eof
r1 = load ('myr1.data');
AveR1 = statistics(r1);
printf ("R1 = %6.4f +/- %6.4f, Data points: %d\n", \
  AveR1(6), AveR1(7), length(r1))
eof

```

The angular statistics were calculated from the file with the suffix “*phidata*” with the following R-script:

```

library(circular, quietly=TRUE, verbose=FALSE)
options (warn=-1)
args <- commandArgs(trailingOnly = TRUE)

ref <- read.table ("wig100.phidata")
ref <- circular(ref, type="angles", units="degrees", modulo="2pi")

wig1 <- read.table (args[1])
wig1 <- circular(wig1, type="angles", units="degrees", modulo="2pi")

means <- vector()
means <- circular(means, type="angles", units="degrees", modulo="2pi")

rhos <- vector()
ctsl80 <- vector()

for (c in 1:ncol(wig1)) {

```

```
deltaPhi <- pmax(ref, wigl[,c]) - pmin (wigl[,c] , ref)
deltaPhi <- pmin (deltaPhi, 360-deltaPhi)
# count the number of differences for centrosymmetric data
# should be close to 0 for random data
cts180 <- c(cts180, sum (deltaPhi==180) - sum(deltaPhi==0))
means <- c.circular (means, mean.circular(deltaPhi))
rhos <- c (rhos, rho.circular(deltaPhi))
}

meanphi <- mean.circular (means)
meanrho <- mean (rhos)
print (c(args[1], "Angular mean =", round(meanphi,digits=1)))
print (c(args[1], "Angular rho  =", round(mean(rhos), digits=3)))
```

## 4 Coordinate Error and Outlier Detection

Full-matrix least squares refinement as implemented in SHELXL allows the calculation of parameter errors. This is routinely used for small molecule structures but also for macromolecular studies, e.g. [9, 10, 11]. The memory requirement of this method increases quadratically with the number of parameters and thus is often not feasible for large crystallographic structures. Errors are instead often estimated based on the Luzzati statistics [12]. Like Wilson, Luzzati only took coordinate errors into account, but not errors in the atomic displacement parameters. The limits of this assumption have been presented above. Several further developments exist based on statistical assumptions [13, 14, 15]

The large number of coordinate files that are created during the calculation of *R*<sub>complete</sub> allow the calculation of coordinate errors without statistical assumptions.

The program `CrossCheck` by JL analyses all coordinate files, creates a new file in PDB-format with average coordinates and omitting all  $3\sigma$  outliers, and lists the atoms with large standard deviations. Table S30 shows an example from the 1.9 Å insulin structure. The list of outliers is very similar. However, with perturbing the parameters much greater deviations even beyond the original amplitude are present and thus more easily detected. In this example, several water molecules could be detected that are only added to noise peaks, and the side chain of lysine B29, residue 2029 in the SHELXL ins-file, should clearly be omitted from the model. Such a list has great value for very large models where poorly modelled side chains may be easily overlooked.

## References

- [1] Sheldrick, G. (2008) A short history of *SHELX*. *Acta Crystallogr.* **A64**, 112–122.
- [2] Emsley, P, Lohkamp, B, Scott, W, & Cowtan, K. (2010) Features and development of *Coot*. *Acta Crystallogr.* **D66**, 486–501.
- [3] Tickle, I, Laskowski, R, & Moss, D. (2000) Rfree and the Rfree ratio. II. Calculation of the expected values and variances of cross-validation statistics in macromolecular least-squares refinement. *Acta Crystallogr.* **D56**, 442–450.
- [4] Sheldrick, G. (2010) Experimental phasing with *SHELXC/D/E*: combining chain tracing with density modification. *Acta Crystallogr.* **D66**, 479–485.

Table S30: Example Output from the program CrossCheck. Refinement without (WIGL 0 0) and with (WIGL -0.4 -0.4) perturbation of the parameters. Perturbation appears to result in larger fluctuations making it easier to identify too optimistically modelled atoms.

| WIGL 0 0 |      |      |         | WIGL -0.4 -0.4 |      |      |         |
|----------|------|------|---------|----------------|------|------|---------|
| Type     | Resi | #    | ESD [Å] | Type           | Resi | #    | ESD [Å] |
| O        | HOH  | 23   | 0.6     | O              | HOH  | 33   | 4.6     |
| O        | HOH  | 26   | 0.3     | O              | HOH  | 26   | 0.6     |
| O4 A     | PO4  | 101  | 0.2     | O              | HOH  | 23   | 0.6     |
| NZ       | LYS  | 2029 | 0.1     | NZ             | LYS  | 2029 | 0.5     |
| O3 A     | PO4  | 101  | 0.1     | CD             | LYS  | 2029 | 0.4     |
| CE       | LYS  | 2029 | 0.1     | O              | HOH  | 28   | 0.4     |
| O1 A     | PO4  | 101  | 0.1     | O              | HOH  | 4    | 0.4     |
| O2 A     | PO4  | 101  | 0.1     | O              | HOH  | 21   | 0.4     |

- [5] Adams, P, Afonine, P, Bunkóczi, G, Chen, V, Davis, I, Echols, N, Headd, J, Hung, L.-W, Kapral, G, Grosse-Kunstleve, R, McCoy, A, Moriarty, N, Oeffner, R, Read, R, Richardson, D, Richardson, J, Terwilliger, T, & Zwart, P. (2010) *PHENIX*: a comprehensive Python-based system for macromolecular structure solution. *Acta Crystallogr D* **66**, 213–221.
- [6] Kleywegt, G. (2002) *Uppsala Software Factory* (Uppsala University, Dept. of Cell. and Mol. Biology).
- [7] Winn, M, Ballard, C, Cowtan, K, Dodson, E, Emsley, P, Evans, P, Keegan, R, Krissinel, E, Leslie, A, McCoy, A, McNicholas, S, Murshudov, G, Pannu, N, Potterton, E, Powell, H, Read, R, Vagin, A, & Wilson, K. (2011) Overview of the *CCP4* suite and current developments. *Acta Crystallogr D* **67**, 235–242.
- [8] Kabsch, W. (2010) Integration, scaling, space-group assignment and post-refinement. *Acta Crystallogr D* **66**, 133–144.
- [9] Köpfer, D, Sing, C, Gruene, T, Sheldrick, G, Zachariae, U, & de Groot, B. (2014) Ion permeation in  $K^+$  channels occurs by direct coulomb knock-on. *Science* **346**, 352–355.
- [10] Gruene, T, Hahn, H, Meilleur, F, & Sheldrick, G. (2014) Refinement of macromolecular structures against neutron data with shelxl-2013. *J Appl Crystallogr* **47**, 462–466.
- [11] Meyer, D, Neumann, P, Koers, E, Sjuts, H, LÄijdtke, S, Sheldrick, G. M, Ficner, R, & Tittmann, K. (2012) Unexpected tautomeric equilibria of the carbanion-enamine intermediate in pyruvate oxidase highlight unrecognized chemical versatility of the thiamin cofactor. *Proc Natl Acad Sci U S A* **109**, 10867–10872.
- [12] Luzzati, P. (1952) Traitement statistique des erreurs dans la détermination des structures cristallines. *Acta Crystallogr* **5**, 802–810.
- [13] Cruickshank, D. (1999) Remarks about protein structure precision. *Acta Crystallogr D* **55**, 583–601.
- [14] Read, R. (1986) Improved Fourier coefficients for maps using phases from partial structures with errors. *Acta Crystallogr A* **42**, 140–149.
- [15] Gurusaran, M, Shankar, M, Nagarajan, R, Helliwell, J, & Sekar, K. (2014) Do we see what we should see? Describing non-covalent interactions in protein structures including precision. *IUCrJ* **1**, 74–81.
